# Supplementary material for: Bcl11b sets pro-T cell fate by site-specific cofactor recruitment and by repressing Id2 and Zbtb16
Source: Springer Nature journal article supplement (doi:10.1038/s41590-018-0238-4), 2018-10-29
Supplement: MOESM4 [file 41590_2018_238_MOESM4_ESM.xlsx]

## Sheet: Bcl11b-dependent genes
Supplementary Table 2: DIFFERENTIALLY EXPRESSED GENES IN BCL11B-DEFICIENT DN CELLS, |Log2FC|>1, p.adj<0.05, RPKM>1, sorted from highest to lowest log2 fold change value in response to Bcl11b deletion
DEGs defined by Cas9 disruption of Bcl11b in BM-derived DN2b/DN3 cells differentiating in culture: inferred Bcl11b-dependent targets
			RPKM											Ratio and adjusted pval
Transcript/RepeatID (cmd=analyzeRepeats.pl rna mm9 -count exons -noadj -condenseGenes -d 17326/17326.rsem/17326_STAR_RSEM_mm9_tagdir/ 17828/17828.rsem/17828_STAR_RSEM_mm9_tagdir/ /rothenberg/sulu/data01/common/maile/rnaseq/18857/18857.rsem/18857_STAR_RSEM_mm9_tagdir/ /rothenberg/sulu/data01/common/maile/rnaseq/17813/17813.rsem/17813_STAR_RSEM_mm9_tagdir/ 17345/17345.rsem/17345_STAR_RSEM_mm9_tagdi…	chr	Annotation/Divergence	sgCont AVE	sgBcl11b AVE		sgCont rep1	sgCont rep2	sgCont rep3	sgCont rep4	sgBcl11b rep1	sgBcl11b rep2	sgBcl11b rep3	sgBcl11b rep4	sgCont vs. sgBcl11b Log2 Fold Change	sgCont vs. sgBcl11b adj. p-value
NM_001013390	chr9	Scn4b|Gm1471|-|9|9 A5.2|protein-coding	1.7635	0.01975		0.476	1.965	2.724	1.889	0.017	0.016	0.014	0.032	-6.37511	5.00927e-16
NM_009852	chr19	Cd6|-|-|19 A|19 7.16 cM|protein-coding	3.346	0.062		1.354	3.625	5.219	3.186	0	0.138	0.072	0.038	-5.78081	7.27387e-13
NR_039591	chr2	Mir5129|mir-5129|mmu-mir-5129|mu-mir-5129|-|2 B|2 27.31 cM|ncRNA	2.15325	0		0.681	2.301	2.404	3.227	0	0	0	0	-5.45486	0.00129227
NM_008256	chr3	Hmgcs2|1300002P16|mHS|-|3 F2.2|3 42.74 cM|protein-coding	7.84475	0.31925		1.438	7.072	16.106	6.763	0.055	0.408	0.448	0.366	-4.607	1.19335e-06
NM_028283	chr9	Uaca|2700059D02Rik|nucling|-|9|9 B|protein-coding	5.7545	0.2865		1.416	8.877	3.767	8.958	0.294	0.441	0.102	0.309	-4.3029	1.47767e-08
NM_017372	chr10	Lyz2|AI326280|Lys|Lysm|Lyzf2|Lyzs|Lzm|Lzm-s1|Lzp|-|10 D2|10 65.34 cM|protein-coding	3.27425	0.17575		2.02	4.99	1.674	4.413	0.034	0.51	0.029	0.13	-4.21258	4.92747e-05
NM_009850	chr9	Cd3g|Ctg-3|Ctg3|T3g|-|9 A5.2|9 24.84 cM|protein-coding	510.421	29.5145		453.721	575.938	528.564	483.461	38.626	29.769	27.308	22.355	-4.10553	1.04169e-64
NM_013487	chr9	Cd3d|T3d|-|9 A5.2|9 24.84 cM|protein-coding	104.327	7.84525		86.086	79.762	178.451	73.011	8.443	6.356	10.726	5.856	-3.72877	4.64039e-20
NM_009763	chr5	Bst1|114/A10|A530073F09|BP-3|Bp3|Bsta1|CD157|Ly65|-|5 B3|5 23.84 cM|protein-coding	5.7	0.45225		3.653	5.746	8.414	4.987	0.806	0.519	0.155	0.329	-3.64254	9.97548e-10
NM_009903	chr5	Cldn4|Cep-r|Cpetr|Cpetr1|-|5 G2|5 74.9 cM|protein-coding	1.5065	0.119		0.261	1.273	3.821	0.671	0.02	0.167	0.199	0.09	-3.62706	0.0029268
NM_007648	chr9	Cd3e|AI504783|CD3|CD3epsilon|T3e|-|9 A5.2|9 24.84 cM|protein-coding	43.6745	3.61575		40.568	35.509	65.459	33.162	4.801	3.172	4.902	1.588	-3.58818	2.97117e-14
NM_028902	chr17	Hsf2bp|4932437G14Rik|-|17|17 B1|protein-coding	2.24575	0.20125		0.661	2.53	3.067	2.725	0.063	0.223	0.137	0.382	-3.45758	5.65867e-06
NM_145551	chr4	Slc5a9|AI159731|SGLT4|-|4|4 D1|protein-coding	11.3603	1.05175		0.984	9.766	26.161	8.53	0.324	0.957	2.141	0.785	-3.41577	0.00285703
NM_011374	chr6	St8sia1|9330109E03Rik|GD3S|Sia-T|Siat8|Siat8a|-|6 G2-G3|6 74.78 cM|protein-coding	6.40775	0.5935		2.409	5.602	11.182	6.438	0.806	0.593	0.374	0.601	-3.41156	5.24422e-11
NM_145403	chr9	Tmprss4|mCAP2|-|9|9 A5.2|protein-coding	1.15325	0.11075		0.85	0.897	2.069	0.797	0.112	0.089	0.133	0.109	-3.35434	2.21561e-08
NM_001081756	chr1	Nckap5|8430408F21|D130011D22Rik|E030049G20Rik|Erih1|Erih2|Gm1548|Nap5|-|1|1 E3|protein-coding	1.75875	0.18775		0.382	2.366	1.537	2.75	0.049	0.261	0.081	0.36	-3.32658	0.00253978
NM_145621	chr9	Camkv|1G5|BB074618|BC017634|-|9|9 F1|protein-coding	1.386	0.14975		0.217	1.62	2.024	1.683	0.012	0.2	0.179	0.208	-3.18667	0.00303696
NM_053110	chr6	Gpnmb|DC-HIL|Dchil|ipd|-|6 B2.3|6 23.82 cM|protein-coding	1.956	0.22275		0.893	0.833	4.712	1.386	0.19	0.168	0.317	0.216	-3.11678	6.99926e-05
NR_040432	chr5	Gm15708|OTTMUSG00000025583|-|5 G2|5 83.27 cM|ncRNA	6.181	0.72625		1.07	7.396	9.259	6.999	0.307	1.102	0.63	0.866	-3.07512	9.19733e-05
NR_110336	chr11	Dgkeos|A930013B10Rik|-|11|11 C|ncRNA	10.0415	1.188		5.372	8.095	18.41	8.289	0.8	1.531	1.175	1.246	-3.0715	7.13085e-09
NR_136760	chr12	Gm26839|-|-|12 E|12|ncRNA	1.71125	0.20675		0.438	1.861	1.878	2.668	0.215	0.44	0.107	0.065	-3.02577	0.00172288
NR_015511	chr9	E030011O05Rik|-|-|9|9 E3.3|ncRNA	1.02975	0.1315		1.071	1.12	0.691	1.237	0.19	0.221	0.079	0.036	-2.98524	5.31223e-06
NM_007962	chr9	Mpzl2|Eva|Eva1|-|9 A5.2|9 24.84 cM|protein-coding	3.17025	0.41825		5.842	2.529	2.116	2.194	0.708	0.292	0.299	0.374	-2.94268	2.28008e-06
NM_145438	chr11	Llgl2|9130006H11Rik|Llglh2|-|11|11 E2|protein-coding	2.44375	0.32125		1.313	2.41	3.53	2.522	0.349	0.305	0.359	0.272	-2.91231	4.34507e-12
NM_001039554	chr4	Angptl7|-|-|4|4 E2|protein-coding	1.23925	0.163		0.599	1.155	2.222	0.981	0.21	0.228	0.015	0.199	-2.90916	0.00105451
NM_027222	chr18	Mzb1|2010001M09Rik|AV064572|PACAP|pERp1|-|18|18 B2|protein-coding	8.35675	1.11		2.883	8.426	14.572	7.546	1.201	1.266	1.033	0.94	-2.89234	4.98627e-07
NM_001101605	chr19	Ifit1bl1|Gm14446|Ifit1c|OTTMUSG00000016644|-|19 C1|19|protein-coding	5.59875	0.762		4.742	5.337	6.797	5.519	0.375	1.136	0.488	1.049	-2.88607	3.90762e-11
NM_173434	chr11	9930111J21Rik2|9930111J21Rik|Irgb5|OTTMUSG00000005540|-|11|11 B1.2|protein-coding	8.00975	1.13325		5.782	6.147	11.131	8.979	1.833	0.95	0.851	0.899	-2.807	4.1085e-11
NM_007650	chr19	Cd5|Ly-1|Ly-12|Ly-A|Lyt-1|-|19 A|19 7.16 cM|protein-coding	11.8673	1.776		7.356	12.719	13.913	13.481	2.138	1.955	1.167	1.844	-2.72942	1.3643e-16
NM_001004174	chr2	AA467197|Nmes1|mir-147|-|2|2 E5|protein-coding	29.749	4.4835		24.638	19.873	54.598	19.887	5.749	3.387	5.782	3.016	-2.72255	1.73127e-07
NM_025685	chr4	Col27a1|5730512J02Rik|AI449266|-|4|4 B3|protein-coding	1.74825	0.26325		0.27	2.392	1.691	2.64	0.114	0.509	0.135	0.295	-2.72091	0.00328378
NM_173781	chr9	Rab6b|9630015C03|AI844641|C330006L04Rik|D9Bwg0185e|-|9 F1|9 54.88 cM|protein-coding	4.18175	0.644		1.065	3.728	8.27	3.664	0.229	0.716	0.921	0.71	-2.68937	0.000483682
NM_001114679	chr11	9930111J21Rik1|9930111J21Rik|Iigp|-|11|11 B1.2|protein-coding	4.601	0.708		3.289	3.528	6.448	5.139	1.009	0.512	0.583	0.728	-2.68622	8.74347e-12
NM_009401	chr4	Tnfrsf8|Cd30|D1S166E|Ki|Ki-1|-|4 E1|4 78.17 cM|protein-coding	6.79175	1.0475		2.151	6.065	11.908	7.043	0.716	1.503	0.904	1.067	-2.68606	8.78672e-06
NM_183259	chr11	Smim5|2210020M01Rik|-|11|11 E2|protein-coding	17.4485	2.73075		2.803	22.966	24.686	19.339	2.12	3.153	2.791	2.859	-2.65222	0.000156498
NM_001081369	chr9	Ccdc153|-|-|9|9 A5.2|protein-coding	3.221	0.52175		3.213	1.415	7.077	1.179	0.468	0.591	0.724	0.304	-2.63142	0.00249189
NM_009655	chr16	Alcam|AI853494|BEN|CD166|DM-GRASP|MuSC|SC1|-|16|16 B5|protein-coding	4.75175	0.76275		1.278	6.276	4.262	7.191	0.337	1.187	0.501	1.026	-2.63031	0.000159856
NM_026189	chr9	Eepd1|2310005P05Rik|AI481005|-|9|9 A4|protein-coding	1.681	0.2755		0.915	2.329	1.842	1.638	0.352	0.34	0.113	0.297	-2.59489	2.41422e-06
NM_010768	chr10	Matk|CHK|HYL|Ntk|p56ntk|-|10 39.72 cM|10 C1|protein-coding	4.82625	0.79275		1.717	5.416	6.973	5.199	0.531	0.823	0.983	0.834	-2.58707	8.74744e-07
NM_028238	chr7	Rab38|2310011F14Rik|AU043391|cht|-|7 D3|7 49.19 cM|protein-coding	3.40675	0.5615		4.719	4.26	1.61	3.038	1.49	0.362	0.134	0.26	-2.5857	0.0161934
NM_013569	chr5	Kcnh2|AI326795|ERG1|LQT|Lqt2|M-erg|Merg1|merg1a|merg1b|-|5 A3|5 10.94 cM|protein-coding	2.2075	0.4685		4.121	1.092	2.61	1.007	0.431	0.358	0.519	0.566	-2.55458	0.000116828
NM_001111058	chr7	Cd33|Siglec-3|gp67|-|7 B3|7 28.25 cM|protein-coding	6.268	1.05525		3.868	6.458	6.731	8.015	1.773	1.108	0.581	0.759	-2.5481	1.34595e-07
NM_133167	chr15	Parvb|AI595373|AW742462|D15Gsk1|affixin|-|15|15 E2|protein-coding	20.53	3.50175		12.303	14.779	41.085	13.953	3.379	3.377	4.545	2.706	-2.54435	1.69878e-07
NM_001045540	chr11	Gm12185|Irgb2b1|OTTMUSG00000005523|-|11 B1.2|11|protein-coding	1.3925	0.24		1.886	1.14	1.326	1.218	0.402	0.152	0.21	0.196	-2.54049	2.95313e-07
NM_001100462	chr8	Tmem221|-|-|8|8 B3.3|protein-coding	2.37225	0.40275		1.624	2.288	3.704	1.873	0.517	0.175	0.528	0.391	-2.53542	7.53955e-06
NR_030547	chr2	Mir147|Mirn147|mmu-mir-147|-|2 E5|2|ncRNA	30.0698	5.16125		25.204	16.809	60.924	17.342	7.853	4.295	5	3.497	-2.53536	0.000713411
NM_001024230	chr11	Gm5431|EG432555|Irgb9b8|-|11|11 B1.2|protein-coding	1.2595	0.2165		1.141	0.873	1.562	1.462	0.328	0.17	0.101	0.267	-2.53498	2.41588e-06
NM_145226	chr5	Oas3|Oasl10|-|5 F|5 60.64 cM|protein-coding	1.11475	0.196		1.617	1.04	0.768	1.034	0.391	0.178	0.134	0.081	-2.51307	0.000268976
NM_013652	chr11	Ccl4|AT744.1|Act-2|MIP-1B|Mip1b|Scya4|-|11 C|11 51.09 cM|protein-coding	1.09425	0.18575		0.92	1.028	1.46	0.969	0.055	0.205	0.275	0.208	-2.49568	1.23906e-05
NM_001025261	chr3	Tpd52|AI043038|mD52|-|3|3 A1|protein-coding	47.3563	8.6255		49.394	50.453	43.034	46.544	13.819	7.893	6.351	6.439	-2.48325	8.17723e-14
NM_010139	chr4	Epha2|AW545284|Eck|Myk2|Sek-2|Sek2|-|4 D3|4 73.67 cM|protein-coding	2.72775	0.48625		1.038	3.984	2.587	3.302	0.359	0.659	0.23	0.697	-2.47433	3.6716e-05
NM_011408	chr11	Slfn2|Shlf2|-|11 C|11 50.3 cM|protein-coding	11.0707	2.00225		12.459	10.139	13.254	8.431	3.364	1.574	1.428	1.643	-2.46494	8.21223e-09
NM_001033337	chr15	Ttc38|9030019H09|-|15|15 E2|protein-coding	2.3095	0.43425		1.804	2.097	3.024	2.313	0.502	0.466	0.353	0.416	-2.40747	9.64991e-13
NM_172786	chr10	Il20ra|E230031K19|-|10|10 A3|protein-coding	1.06525	0.20175		1.059	0.75	1.722	0.73	0.208	0.274	0.115	0.21	-2.40662	4.54637e-05
NM_001127382	chr5	Rbm47|9530077J19Rik|-|5|5 C3.1|protein-coding	1.02275	0.20425		0.834	1.203	0.751	1.303	0.169	0.258	0.186	0.204	-2.40218	2.16314e-09
NM_007601	chr2	Capn3|AI323605|Capa-3|Capa3|Lp82|p94|-|2 E5|2 60.31 cM|protein-coding	1.1735	0.22225		0.625	1.104	1.935	1.03	0.18	0.232	0.288	0.189	-2.40063	1.09808e-05
NM_001177696	chr5	Ablim2|AI606905|C230091L11|-|5|5 B3|protein-coding	1.3275	0.25275		0.344	1.003	3.142	0.821	0.084	0.176	0.385	0.366	-2.39807	0.0188726
NM_001033382	chr6	Cacna2d4|5730412N02Rik|BE686333|-|6|6 F1|protein-coding	2.2205	0.421		0.691	2.031	3.797	2.363	0.152	0.489	0.659	0.384	-2.37474	0.00108064
NM_019925	chr12	Gpr132|G2a|-|12|12 F1|protein-coding	49.5213	9.43675		28.301	53.764	63.008	53.012	13.516	9.277	7.087	7.867	-2.37207	1.77828e-12
NM_057173	chr7	Lmo1|Rbtn-1|Rbtn1|Ttg1|-|7 E3|7 57.21 cM|protein-coding	4.655	0.931		4.294	5.994	2.214	6.118	1.157	1.542	0.353	0.672	-2.3541	0.000666221
NM_021887	chr7	Il21r|NILR|-|7|7 F3|protein-coding	10.1643	2.0325		7.845	9.063	14.157	9.592	2.609	2.439	1.537	1.545	-2.31804	1.00654e-11
NM_212452	chr3	Rxfp1|Gm1018|Lgr7|-|3|3 E3|protein-coding	1.529	0.3145		0.534	1.051	3.553	0.978	0.128	0.371	0.372	0.387	-2.27135	0.0121188
NM_028979	chr4	Cyp2j9|8430417E17Rik|-|4|4 C5|protein-coding	1.2435	0.26		1.383	1.1	1.149	1.342	0.391	0.173	0.264	0.212	-2.26038	1.53796e-06
NM_001347448	chr5	Oas2|Oasl11|-|5 F|5 60.64 cM|protein-coding	1.449	0.30325		0.96	1.721	1.33	1.785	0.159	0.496	0.218	0.34	-2.23756	6.40017e-06
NM_011656	chr3	Tuft1|-|-|3|3 F2.1|protein-coding	1.2755	0.2685		0.638	1.809	1.127	1.528	0.297	0.224	0.2	0.353	-2.22465	3.37528e-05
NM_172588	chr13	Serinc5|A130038L21Rik|AIGP3|C86123|TPO1|-|13|13 C3|protein-coding	5.9185	1.25575		1.675	6.607	8.168	7.224	0.788	1.566	1.25	1.419	-2.2235	4.29161e-05
NM_001281999	chr5	Rasal1|MRASAL|-|5|5 F|protein-coding	11.1963	2.4095		2.073	13.827	14.742	14.143	0.483	3.61	2.597	2.948	-2.22158	0.0216224
NM_016685	chr8	Comp|TSP5|-|8 B3.3|8 34.15 cM|protein-coding	1.0735	0.234		0.632	1.252	0.975	1.435	0.15	0.334	0.1	0.352	-2.18549	0.000415701
NM_028627	chr19	Psd|1110007H17Rik|A930015K15|Efa6|Efa6a|Psdl|mKIAA2011|-|19 C3|19 38.8 cM|protein-coding	4.3245	0.936		0.601	5.525	5.146	6.026	0.669	1.105	1.028	0.942	-2.18391	0.0047739
NM_080643	chr11	Caskin2|1600028L06Rik|mKIAA1139|-|11|11 E2|protein-coding	2.65925	0.58675		1.734	2.805	3.296	2.802	0.46	0.72	0.511	0.656	-2.17607	1.98116e-11
NR_108041	chr15	9030619P08Rik|-|-|15|15 D3|pseudo	3.17275	0.70775		3.042	2.409	3.292	3.948	0.929	0.786	0.317	0.799	-2.16766	1.85244e-05
NM_001025573	chr6	Slc23a4|2010107G12Rik|Gm468|-|6|6 B1|protein-coding	6.7035	1.511		2.648	5.774	13.662	4.73	0.604	2.23	1.508	1.702	-2.15093	0.00285089
NM_028127	chr12	Frmd6|2610019M19Rik|4930488L10Rik|AW212977|Willin|-|12|12 C2|protein-coding	30.8885	6.978		23.273	32.041	37.134	31.106	7.554	8.286	4.933	7.139	-2.14323	9.09254e-21
NR_110572	chr2	Zeb2os|Gm13476|OTTMUSG00000012358|Zeb2nat|-|2|2 B|ncRNA	1.6485	0.373		0.545	2.564	1.615	1.87	0.139	0.748	0.185	0.42	-2.13153	0.0185004
NM_015753	chr2	Zeb2|9130203F04Rik|D130016B08Rik|SIP1|Zfhx1b|Zfx1b|Zfxh1b|-|2|2 B|protein-coding	4.88025	1.10025		1.197	6.95	4.521	6.853	0.572	1.81	0.564	1.455	-2.12593	0.00522992
NM_201529	chr14	Lmo7|C78582|FBXO20|Gm914|mKIAA0858|-|14 E2.3|14 50.9 cM|protein-coding	1.37925	0.31675		1.225	1.03	2.11	1.152	0.462	0.261	0.275	0.269	-2.12088	4.36431e-06
NR_015488	chr16	A930003A15Rik|AI853191|-|16|16 A3|ncRNA	3.95	0.9385		2.786	4.569	3.31	5.135	1.17	1.121	0.443	1.02	-2.11381	1.80058e-05
NM_183309	chr6	Gm5111|A630038D02|EG330305|-|6 B2.3|6|protein-coding	18.6043	4.27025		22.089	15.835	21.022	15.471	9.121	2.792	1.531	3.637	-2.11277	0.0023331
NM_016982	chr16	Vpreb1|CD179a|Vpreb-1|-|16 A3|16 10.46 cM|protein-coding	1.8515	0.433		1.407	1.438	2.827	1.734	0.707	0.351	0.353	0.321	-2.09052	0.000531823
NM_001163945	chr17	Rpl3l|1110057H16Rik|-|17|17 A3.3|protein-coding	5.163	1.19975		1.503	6.331	6.262	6.556	0.821	1.281	1.213	1.484	-2.08444	0.00045392
NM_026380	chr1	Rgs8|6530413N01Rik|-|1 G3|1 65.41 cM|protein-coding	1.3975	0.329		1.25	1.466	1.701	1.173	0.408	0.379	0.195	0.334	-2.07421	1.68808e-07
NM_172536	chr9	Zfp609|9830165N24|BC016271|Znf609|mKIAA0295|-|9|9 C|protein-coding	2.9915	0.70775		3.672	2.645	2.851	2.798	1.488	0.426	0.392	0.525	-2.06835	0.000606638
NM_001291222	chr7	Kif7|-|-|7|7 D2|protein-coding	3.55125	0.84675		2.298	4.106	4.302	3.499	0.912	1.026	0.619	0.83	-2.06134	1.52878e-10
NR_039592	chr14	Mir5130|mir-5130|mmu-mir-5130|mu-mir-5130|-|14 E2.3|14 51.55 cM|ncRNA	21.6193	5.32175		20.527	26.896	17.102	21.952	7.814	5.651	2.892	4.93	-2.02309	7.08533e-05
NM_029682	chr19	Stambpl1|1700095N21Rik|8230401J17Rik|ALMalpha|AMSH-FP|-|19|19 C1|protein-coding	11.2012	2.7535		7.577	10.658	16.033	10.537	2.054	2.677	3.16	3.123	-2.02025	3.06942e-10
NR_045270	chr6	1700101I11Rik|-|-|6|6 F3|ncRNA	1.31125	0.31875		0.782	1.454	1.842	1.167	0.762	0.167	0.075	0.271	-2.01545	0.0460816
NM_021344	chr5	Tesc|1010001A17Rik|2410011K10Rik|TE-1|-|5 F|5 57.84 cM|protein-coding	1.40775	0.3425		0.928	1.635	1.854	1.214	0.193	0.431	0.161	0.585	-2.0123	0.00166721
NM_183028	chr1	Pcmtd1|8430411F12Rik|A030012M09Rik|-|1|1 A1|protein-coding	44.8747	11.0887		24.822	49.116	57.763	47.798	7.773	11.813	13.501	11.268	-2.01038	2.07954e-11
NM_175454	chr11	Hid1|C630004H02Rik|-|11|11 E2|protein-coding	13.0575	3.25225		8.395	11.382	21.723	10.73	2.342	3.396	3.573	3.698	-2.0047	5.34048e-08
NM_020486	chr7	Bcam|1200005K12Rik|B-CAM|Gplu|Lu|-|7|7 A3|protein-coding	1.17725	0.30375		2.38	0.504	1.097	0.728	0.166	0.35	0.163	0.536	-2.00163	0.0351721
NM_013866	chr15	Zfp385a|Hzf|Zfp385|Znf385a|-|15|15 F3|protein-coding	25.212	6.27975		22.673	28.18	15.381	34.614	8.751	6.419	3.551	6.398	-1.99701	6.07305e-07
NM_008855	chr7	Prkcb|PKC-B|PKC-Beta|Pkcb|Prkcb1|Prkcb2|-|7 F2|7 65.75 cM|protein-coding	15.2585	3.82275		3.372	15.601	24.915	17.146	1.549	4.162	4.598	4.982	-1.99521	0.00714278
NR_037957	chr16	1300002E11Rik|1500026P21Rik|-|16|16 B1|ncRNA	16.87	5.0445		10.709	18.353	22.893	15.525	2.649	6.013	6.154	5.362	-1.99233	6.72393e-07
NM_019866	chr7	Spib|Spi-B|-|7 B3|7 28.83 cM|protein-coding	7.7775	1.956		3.963	8.164	11.719	7.264	0.48	2.098	2.732	2.514	-1.99226	0.00308569
NM_001170395	chr6	Cd163|CD163v2|CD163v3|-|6|6 F2|protein-coding	2.06125	0.51975		1.182	2.196	2.081	2.786	0.386	0.572	0.444	0.677	-1.97882	5.35838e-07
NM_030239	chr5	Abcg3|Abcp2|Mxr2|-|5 E5|5 50.68 cM|protein-coding	12.036	3.08925		6.318	10.539	19.818	11.469	3.035	3.11	3.481	2.731	-1.95045	3.94478e-07
NM_001288628	chr6	Emp1|I-8-09|TMP|-|6 G1|6 66.25 cM|protein-coding	21.3765	5.55775		16.795	26.374	21.159	21.178	3.385	7.308	4.764	6.774	-1.94876	2.23483e-11
NM_175026	chr1	Ifi209|4930422C14|AI447904|Ifix|Pyhin-1|Pyhin1|-|1|1 H3|protein-coding	12.3148	3.2435		7.184	13.857	14.597	13.621	1.105	4.486	2.847	4.536	-1.93153	0.000176691
NM_029758	chr12	Fam49a|2410157M17Rik|9630047E15|D12Ertd553e|-|12 A1.1|12 5.63 cM|protein-coding	2.18625	0.57825		1.068	2.977	1.841	2.859	0.288	0.929	0.34	0.756	-1.91651	0.0015579
NM_001302479	chr19	Acy3|0610006H10Rik|AA3|AAIII|AW107362|Acy-3|HCBP1|-|19|19 A|protein-coding	11.1175	2.97925		4.392	11.162	16.775	12.141	1.666	3.128	4.267	2.856	-1.90584	0.000330593
NM_029653	chr13	Dapk1|D13Ucla1|DAP-Kinase|-|13 B2|13 32.53 cM|protein-coding	17.704	4.709		6.152	18.11	26.008	20.546	3.641	5.125	4.976	5.094	-1.90535	1.22405e-05
NR_033207	chr3	2010016I18Rik|-|-|3|3 F2.3|ncRNA	4.291	1.1485		2.342	4.031	7.278	3.513	0.903	1.486	0.925	1.28	-1.89661	0.00017039
NM_019518	chr15	Grasp|tamalin|-|15|15 F1|protein-coding	11.4695	3.06375		3.61	15.737	13.72	12.811	2.769	3.628	2.305	3.553	-1.88646	0.000237468
NM_133710	chr9	Ctdspl|2810418J22Rik|AI426263|HYA22|SCP3|-|9|9 F3|protein-coding	1.322	0.36		1.141	1.972	0.555	1.62	0.226	0.61	0.084	0.52	-1.88637	0.0403417
NM_178711	chr9	Plscr4|AV245873|-|9|9 E3.3|protein-coding	1.1505	0.3125		1.154	1.353	0.922	1.173	0.499	0.248	0.259	0.244	-1.87744	7.4658e-05
NM_011854	chr5	Oasl2|M1204|Mmu-OASL|Oasl|-|5|5 F|protein-coding	3.43125	0.9595		6.344	2.538	1.825	3.018	1.037	0.9	0.959	0.942	-1.86994	0.000804125
NR_028586	chr11	Gm11978|OTTMUSG00000005125|OTTMUSG00000005127|-|11|11 A1|pseudo	2.86625	0.78725		2.057	1.744	5.222	2.442	0.693	1.005	0.738	0.713	-1.8644	0.00116024
NM_026639	chr6	Art4|4432404K01Rik|ARTC4|DO|DOK1|-|6 G1|6 66.72 cM|protein-coding	21.0968	5.87125		14.114	22.998	24.229	23.046	5.407	7.055	5.233	5.79	-1.8406	2.89798e-15
NM_020590	chr6	Gabarapl1|3110025G09Rik|9130422N19Rik|AI196471|Apg8l|Atg8l|GECI|MNCb-0091|-|6|6 F3|protein-coding	28.5343	7.907		26.894	31.344	28.465	27.434	14.56	7.394	4.533	5.141	-1.83647	9.03806e-05
NM_028481	chr5	Ccdc18|1700021E15Rik|4932411G06Rik|NY-SAR-41|-|5|5 F|protein-coding	8.87575	2.477		4.663	6.151	18.877	5.812	2.531	2.354	2.523	2.5	-1.83276	0.00100176
NR_015602	chr12	F730043M19Rik|-|-|12|12 A3|ncRNA	2.53475	0.70525		1.086	2.683	3.136	3.234	0.35	0.737	0.816	0.918	-1.82865	0.00183484
NM_001024721	chr1	Ifi214|Pyhin-B|p214|-|1|1 H3|protein-coding	5.4005	1.526		3.035	5.672	6.953	5.942	0.42	2.291	1.189	2.204	-1.82794	0.00731702
NM_175543	chr11	Rab11fip4|A730072L08Rik|RAB11-FIP4|mKIAA1821|-|11 B5|11 46.88 cM|protein-coding	4.136	1.1655		2.564	2.345	8.908	2.727	0.818	1.028	1.525	1.291	-1.82606	0.0054726
NM_001167891	chr18	Nrg2|Don1|NTAK|-|18 B2|18 19.38 cM|protein-coding	2.026	0.57025		0.8	2.124	2.879	2.301	0.179	0.749	0.511	0.842	-1.82401	0.013125
NM_025276	chr11	Evpl|-|-|11|11 E2|protein-coding	11.4743	3.2395		6.292	14.109	11.004	14.492	3.872	3.648	2.297	3.141	-1.80856	3.22208e-08
NM_133186	chr1	Steap3|1010001D01Rik|Tsap6|pHyde|-|1|1 E2.3|protein-coding	10.5518	3.077		15.729	10.122	6.109	10.247	4.615	3.28	1.703	2.71	-1.79083	0.000453418
NM_178890	chr2	Abtb2|AW539457|BPOZ-2|-|2|2 E2|protein-coding	12.4377	3.59525		6.589	14.396	13.196	15.57	2.905	4.842	2.115	4.519	-1.78566	5.72041e-06
NM_001177369	chr19	Nfkb2|NF-kappaB2|lyt|p49|p49/p100|p50B|p52|-|19 C3|19 38.8 cM|protein-coding	35.7778	10.2375		8.368	47.695	38.844	48.204	9.505	10.508	10.211	10.726	-1.78055	0.00151525
NM_010386	chr17	H2-DMa|H-2Ma|H2-Ma|-|17 B1|17 17.98 cM|protein-coding	16.108	4.698		13.44	13.122	25.154	12.716	4.761	4.772	4.564	4.695	-1.77858	4.05769e-08
NM_008329	chr1	Ifi204|Ifi16|p204|-|1 H3|1 80.63 cM|protein-coding	7.92725	2.3175		6.725	6.718	11.957	6.309	1.972	2.156	2.443	2.699	-1.77616	9.86933e-08
NM_020260	chr16	Arhgap31|5830477L08Rik|AU041750|Cdgap|D330026I07Rik|-|16|16 B4|protein-coding	1.67325	0.494		1.711	1.489	1.906	1.587	0.453	0.739	0.257	0.527	-1.77384	8.80663e-06
NM_001013773	chr5	Nxpe5|-|-|5|5 G2|protein-coding	2.64475	0.779		2.23	2.83	2.116	3.403	1.001	0.771	0.456	0.888	-1.75796	3.50036e-05
NM_001324486	chr9	Il10ra|AW553859|CDw210|CDw210a|IL-10R1|IL-10RA|Il10r|mIL-10R|-|9 A5.2|9 24.84 cM|protein-coding	14.681	4.3285		16.662	13.277	12.687	16.098	8.338	3.501	2.593	2.882	-1.75064	0.000665743
NM_001081278	chr14	Tbc1d4|5930406J04Rik|A930035N22|AV295684|As160|-|14|14 E2.3|protein-coding	4.3405	1.29175		2.926	3.934	6.349	4.153	1.66	1.043	1.323	1.141	-1.73492	5.08877e-07
NM_019449	chr19	Unc93b1|Unc-93B1|Unc93b|-|19|19 A|protein-coding	86.185	25.8023		59.847	91.363	97.969	95.561	25.685	26.514	26.711	24.299	-1.73247	1.44622e-19
NM_153513	chr3	BC028528|L259|-|3|3 F2.1|protein-coding	10.9863	3.3125		10.974	12.512	9.806	10.653	4.362	3.591	1.892	3.405	-1.73115	6.82085e-06
NM_019511	chr11	Ramp3|AI850306|-|11 A1|11 4.61 cM|protein-coding	66.7963	20.2118		45.267	53.007	119.624	49.287	22.728	17.55	23.857	16.712	-1.71567	3.11399e-05
NM_001111110	chr13	Cmah|-|-|13|13 A3.1|protein-coding	19.8633	6.03125		7.821	17.464	37.75	16.418	3.943	5.373	8.888	5.921	-1.71426	0.00278208
NM_138650	chr16	Dgkg|2900055E17Rik|90kDa|AI854428|Dagk3|E430001K23Rik|mKIAA4131|-|16 B1|16 13.37 cM|protein-coding	2.7565	0.8315		1.124	2.995	3.712	3.195	0.592	0.801	1.002	0.931	-1.71414	0.000199225
NM_001033308	chr4	Themis2|ICB-1|-|4|4 D2.3|protein-coding	8.89475	2.70275		5.203	11.341	6.844	12.191	2.687	3.107	2.024	2.993	-1.70663	3.47031e-06
NM_030887	chr12	Jdp2|Jundm2|Jundp2|TIF|-|12|12 D2|protein-coding	35.9385	11.0463		34.042	28.725	56.248	24.739	14.637	11.502	8.815	9.231	-1.70195	6.43894e-06
NM_021280	chr2	Plcg1|AI894140|Cded|Plc-1|Plc-gamma1|Plcg-1|-|2 H2|2 80.97 cM|protein-coding	98.759	30.3552		59.062	101.399	112.761	121.814	24.54	35.407	27.729	33.745	-1.69713	3.27199e-11
NM_001099631	chr4	Sh2d5|BC036961|-|4|4 D3|protein-coding	24.756	7.641		27.519	20.583	27.888	23.034	13.143	6.448	5.122	5.851	-1.68988	4.02922e-05
NM_177784	chr2	Klhl23|C130068N17Rik|-|2|2 C2|protein-coding	2.50175	0.77875		2.444	2.982	1.887	2.694	0.899	0.981	0.371	0.864	-1.68778	7.99319e-05
NM_177320	chr11	Pik3r5|AV230647|F730038I15Rik|-|11|11 B3|protein-coding	17.7795	5.4525		16.746	15.865	20.19	18.317	10.614	3.426	4.07	3.7	-1.68498	0.000786578
NM_183186	chr12	Foxn3|5430426H20Rik|AA589593|AW556347|Ches1|Ches1l|HTLFL1|-|12|12 E|protein-coding	19.763	6.08675		8.439	20.583	24.397	25.633	4.942	6.294	6.834	6.277	-1.68489	7.60074e-06
NM_020583	chr7	Isg20|1600023I01Rik|2010107M23Rik|20kDa|DnaQL|HEM45|-|7|7 D2|protein-coding	12.6227	3.9975		26.574	6.883	8.371	8.663	7.124	3.235	2.276	3.355	-1.68348	0.0451017
NM_018830	chr19	Asah2|AI585898|-|19|19 C1|protein-coding	1.23425	0.387		1.001	1.22	1.61	1.106	0.421	0.412	0.282	0.433	-1.6713	5.80148e-06
NM_001033289	chr1	Slc9a2|2210416H12Rik|4932415O19Rik|AV333884|NHE2|-|1 B|1 19.66 cM|protein-coding	8.7385	2.74175		3.827	10.878	8.267	11.982	1.119	3.37	3.208	3.27	-1.66644	0.0023331
NM_172574	chr12	Pqlc3|C78076|E030024M05Rik|-|12|12 A1.1|protein-coding	32.7388	10.3325		30.023	26.147	51.408	23.377	11.829	8.59	12.553	8.358	-1.66197	4.55822e-06
NM_011580	chr2	Thbs1|TSP-1|TSP1|Thbs-1|tbsp1|-|2 E5|2 59.34 cM|protein-coding	55.0955	17.4357		34.705	41.306	99.137	45.234	12.912	15.911	23.206	17.714	-1.6576	0.000109425
NM_134135	chr10	Slc39a3|AI845814|Zip3|-|10|10 C1|protein-coding	7.947	2.50625		4.434	9.028	9.209	9.117	1.823	2.441	2.629	3.132	-1.65618	4.6669e-07
NM_001310646	chr14	Tsc22d1|AA589566|AW105905|Egr5|TSC-22|Tgfb1i4|Tsc|Tsc22|-|14 D3|14 40.44 cM|protein-coding	39.8438	20.2628		21.619	66.407	22.24	49.109	14.995	31.714	9.548	24.794	-1.65605	0.00326663
NM_016983	chr16	Vpreb2|CD179b|VpreB1|Vpreb-2|-|16 A3|16 11.14 cM|protein-coding	1.308	0.415		0.861	0.998	1.883	1.49	0.507	0.551	0.282	0.32	-1.65502	0.0156446
NM_172486	chr17	Zfp677|A830058L05Rik|Tce8|-|17|17 A3.2|protein-coding	1.1315	0.358		0.686	1.073	1.741	1.026	0.285	0.427	0.485	0.235	-1.65199	0.00290489
NM_001081462	chr5	Gtf2ird1|1700012P16Rik|BEN|Cream1|ESTM9|GTF3|Gtf2il|MusTRD1|Tg(Alb1-Myc)166.8Sst|WBSCR11|X83320|-|5 G2|5 74.55 cM|protein-coding	6.39775	2.069		6.553	6.76	5.444	6.834	2.651	2.413	0.897	2.315	-1.65106	3.42955e-05
NM_007420	chr18	Adrb2|Adrb-2|Badm|Gpcr7|-|18 E1|18 35.1 cM|protein-coding	4.75475	1.52375		6.131	3.784	5.474	3.63	2.369	1.434	0.98	1.312	-1.64988	0.000606638
NM_026418	chr7	Rgs10|2310010N19Rik|-|7|7 F3|protein-coding	4.9975	1.57125		2.084	7.756	4.266	5.884	1.453	1.853	1.313	1.666	-1.64869	0.00341549
NM_001043228	chr19	Dntt|Tdt|-|19 C3|19 34.32 cM|protein-coding	659.313	212.448		403.846	636.604	998.151	598.651	80.858	238.46	298.66	231.813	-1.63846	0.00128341
NM_008985	chr1	Ptprn|IA-2|mIA-A|mKIAA4064|-|1 C4|1 38.64 cM|protein-coding	1.82125	0.58475		1.479	2.029	1.653	2.124	0.595	0.745	0.393	0.606	-1.63827	5.79815e-06
NM_001077189	chr1	Fcgr2b|AI528646|CD32|F630109E10Rik|Fc[g]RII|FcgRII|Fcgr2|Fcgr2a|Fcr-2|Fcr-3|Ly-17|Ly-m20|LyM-1|Lym-1|fcRII|-|1 H3|1 78.02 cM|protein-coding	5.7825	1.88175		6.117	6.341	5.08	5.592	3.069	1.775	0.945	1.738	-1.6372	0.00134541
NM_001162998	chr11	Smim6|1110017F19Rik|-|11|11 E2|protein-coding	2.946	0.93175		1.134	2.956	3.941	3.753	1.15	0.794	1.081	0.702	-1.63473	0.0102872
NM_139299	chr13	Il31ra|CRL3|GLM-R|GPL|Glmr|NR10|-|13|13 D2.2|protein-coding	6.819	2.186		3.837	8.159	5.76	9.52	2.054	2.728	1.39	2.572	-1.63199	4.05935e-05
NM_013531	chr3	Gnb4|6720453A21Rik|G(beta)4|-|3|3 A3|protein-coding	2.368	0.75875		1.225	3.221	1.69	3.336	0.605	0.893	0.8	0.737	-1.62716	0.000928843
NM_199364	chr8	Lzts1|F37|FEZ1|PSD-Zip70|-|8|8 B3.3|protein-coding	1.24925	0.40325		0.978	1.105	1.254	1.66	0.461	0.41	0.317	0.425	-1.62532	0.000239365
NM_029153	chr13	Scamp1|4930505M11Rik|AI415563|AW122395|-|13|13 C3|protein-coding	4.68075	1.5245		4.397	5.181	4.538	4.607	1.642	1.845	1.132	1.479	-1.62182	1.07032e-09
NM_033602	chr14	Peli2|AW047589|BB129927|-|14 C1|14 24.6 cM|protein-coding	2.632	0.85375		1.508	2.997	3.518	2.505	0.5	0.872	1.212	0.831	-1.61733	0.000159964
NM_011737	chr1	Map3k19|Ysk4|-|1|1 E3|protein-coding	1.35825	0.44		0.828	1.201	2.131	1.273	0.496	0.444	0.375	0.445	-1.61697	0.000457802
NM_008681	chr15	Ndrg1|CAP43|CMT4D|DRG1|HMSNL|NMSL|Ndr1|Ndrl|PROXY1|RTP|TDD5|-|15|15 D2|protein-coding	37.1517	12.2688		64.252	21.024	40.108	23.223	20.964	9.332	9.433	9.346	-1.61475	0.0113878
NR_040446	chr3	C920021L13Rik|-|-|3 F2.1|3|ncRNA	3.6915	1.2055		2.77	4.074	4.139	3.783	1.423	1.304	0.923	1.172	-1.60918	3.28918e-06
NM_177715	chr14	Kctd12|AU046135|AW538430|Pfet1|Pfetin|-|14|14 E2.3|protein-coding	22.7323	7.492		28.29	20.24	22.198	20.201	14.011	6.685	3.766	5.506	-1.59696	0.00246292
NM_001004142	chr11	Nlrp1a|CARD7|DEFCAP|Gm14|Gm15|NAC|Nalp1|Nalp1a|Nlrp1|PP1044|-|11 B4|11 43.21 cM|protein-coding	2.92075	0.9695		2.96	2.856	2.957	2.91	1.279	1.168	0.582	0.849	-1.59486	7.61118e-06
NR_030677	chr10	BC025920|-|-|10|10 C1|pseudo	5.04875	1.665		2.625	5.258	7.162	5.15	0.955	1.953	2.003	1.749	-1.59389	0.000668096
NM_001033450	chr1	Ifi211|A730048F03|Ifi205b|Mnda|ifi-205-B|-|1|1 H3|protein-coding	12.35	4.1145		9.704	11.387	16.538	11.771	3.198	4.705	4.601	3.954	-1.58731	1.57425e-08
NM_033541	chr5	Oas1c|Oasl2|Oasl5|-|5 F|5 60.64 cM|protein-coding	1.75375	0.58875		2.015	1.229	2.304	1.467	0.744	0.618	0.514	0.479	-1.58571	0.000837796
NM_001170853	chr1	Mndal|Gm2785|Ifi212|-|1 H3|1|protein-coding	51.3525	17.1807		39.277	45.378	72.896	47.859	14.614	18.677	17.88	17.552	-1.58055	2.21347e-11
NM_001033379	chr6	Dcp1b|B930050E02Rik|-|6|6 F1|protein-coding	6.55825	2.192		3.241	6.346	9.351	7.295	1.441	2.579	2.5	2.248	-1.57438	0.000137467
NM_001080926	chr4	Lrp8|4932703M08Rik|AA921429|AI848122|ApoER2|Lr8b|-|4|4 C7|protein-coding	10.3725	3.4125		7.817	11.826	7.48	14.367	5.825	3.274	1.812	2.739	-1.57366	0.000871673
NM_001136073	chr2	Nfatc2|AI607462|NF-ATc2|NF-ATp|NFAT1|NFAT1-D|Nfatp|-|2 H3|2 88.91 cM|protein-coding	7.8065	2.65925		7.437	6.111	10.196	7.482	2.611	2.476	2.256	3.294	-1.56886	1.73978e-09
NM_023716	chr13	Tubb2b|2410129E14Rik|brdp|-|13|13 A3.3|protein-coding	14.7335	4.95125		8.455	21.194	11.419	17.866	3.893	6.889	2.944	6.079	-1.56835	0.000565391
NM_001101506	chr4	Tmem240|EG381582|Gm5151|-|4|4 E2|protein-coding	2.01825	0.6735		0.688	2.712	2.721	1.952	0.368	0.757	0.853	0.716	-1.56241	0.0298435
NM_172648	chr1	Ifi205|D3|D3cDNA|Ifi205a|-|1 H3|1 80.83 cM|protein-coding	10.5055	3.5655		8.269	9.963	13.928	9.862	2.83	4.198	4.003	3.231	-1.56028	1.10261e-07
NM_001302649	chr1	Ifi203|Mndal|-|1 H3|1 80.76 cM|protein-coding	24.7185	8.424		20.373	23.06	32.977	22.464	7.54	9.303	8.244	8.609	-1.55874	2.91688e-12
NM_178928	chr18	Afap1l1|AI173486|-|18|18 E1|protein-coding	2.6795	0.907		2.209	3.363	1.195	3.951	0.938	1.01	0.648	1.032	-1.55728	0.00300622
NM_181545	chr11	Slfn8|-|-|11|11 C|protein-coding	13.852	4.68125		6.712	13.668	20.759	14.269	3.61	4.327	6.011	4.777	-1.55412	6.73042e-05
NM_001159404	chr11	Llgl1|AI325176|Lgl1|Llglh|Mgl1|-|11 B2|11 37.81 cM|protein-coding	16.5575	5.6785		13.027	18.547	15.522	19.134	4.744	6.764	4.27	6.936	-1.54904	4.06271e-11
NM_011439	chr1	Sox13|AA407916|AW259412|AW540933|Sox-13|-|1|1 E4|protein-coding	17.7213	6.08625		22.565	16.019	15.934	16.367	8.99	6.31	3.388	5.657	-1.54849	7.22268e-05
NM_001277180	chr7	Gm1966|-|-|7|7 E3|protein-coding	1.42425	0.48375		1.693	1.238	1.171	1.595	0.993	0.301	0.304	0.337	-1.54545	0.0193387
NM_011894	chr14	Sh3bp5|AI606498|SH3BP-5|Sab|-|14|14 B|protein-coding	9.64025	3.336		14.292	7.756	8.87	7.643	5.648	3.032	2.575	2.089	-1.53858	0.00310448
NM_009539	chr1	Zap70|Srk|ZAP-70|mrtle|mur|-|1 B|1 15.41 cM|protein-coding	2.30325	0.78325		1.104	1.715	3.982	2.412	0.791	0.51	1.062	0.77	-1.53653	0.0168715
NM_001134391	chr6	Apobec1|Cdar1|-|6 F1|6 57.68 cM|protein-coding	2.84475	0.994		2.527	3.142	2.722	2.988	1.016	1.28	0.737	0.943	-1.52052	7.3308e-06
NM_013706	chr4	Cd52|AI463198|B7|B7-Ag|CAMPATH-1|CLS1|MB7|-|4 D3|4 66.5 cM|protein-coding	25.6182	9.0085		39.187	23.789	17.81	21.687	14.081	7.184	8.537	6.232	-1.51783	0.00461091
NM_020578	chr17	Ehd3|Ehd2|-|17 E2|17 45.2 cM|protein-coding	4.68175	1.6385		3.677	3.961	7.338	3.751	1.639	2.111	1.414	1.39	-1.51711	5.22216e-05
NM_194061	chr6	D630045J12Rik|Kiaa1549|mKIAA1549|-|6|6 B1|protein-coding	1.20225	0.423		1.235	1.042	1.153	1.379	0.441	0.477	0.293	0.481	-1.51419	7.18758e-07
NM_001201332	chr12	2410004P03Rik|-|-|12|12 A1.1|protein-coding	2.35925	0.8305		2.429	1.682	3.291	2.035	0.966	0.804	0.653	0.899	-1.51227	0.000876858
NM_008829	chr9	Pgr|9930019P03Rik|BB114106|ENSMUSG00000074510|NR3C3|PR|PR-A|PR-B|-|9|9 A1|protein-coding	3.068	1.077		4.321	2.596	2.297	3.058	2.226	0.716	0.676	0.69	-1.50499	0.0322797
NM_178253	chr12	Klhdc1|-|-|12|12 C2|protein-coding	2.85175	1.00725		1.613	2.858	4.053	2.883	0.708	1.109	1.055	1.157	-1.49307	0.000951521
NM_028377	chr12	Bbof1|2900006K08Rik|AI427784|Ccdc176|-|12|12 D1|protein-coding	3.1965	1.138		2.795	2.785	4.453	2.753	1.043	0.939	1.517	1.053	-1.48752	0.000172352
NM_133200	chr3	P2ry14|A330108O13Rik|Gpr105|P2Y14|-|3 D|3 28.96 cM|protein-coding	3.6405	1.2885		3.236	4.001	2.393	4.932	2.034	1.226	0.54	1.354	-1.48305	0.0204381
NM_001278941	chr3	Dennd2d|2010308M01Rik|AI451421|-|3|3 F2.3|protein-coding	9.8445	3.5475		6.534	8.815	15.513	8.516	2.839	3.918	4.006	3.427	-1.47403	1.45143e-05
NM_026122	chr9	Hmgn3|1110002A15Rik|6330514M13Rik|BB071015|TRIP7|-|9|9 E2|protein-coding	2.4245	0.9085		1.612	3.864	2.076	2.146	0.878	1.244	0.626	0.886	-1.47209	0.00979826
NM_009397	chr10	Tnfaip3|A20|Tnfip3|-|10 A3|10 8.08 cM|protein-coding	20.3088	7.32275		13.35	19.911	26.127	21.847	6.969	7.346	6.83	8.146	-1.46528	1.56622e-10
NM_197889	chr4	Ifnz|6030405N23Rik|BGIF|ENSMUSG00000073810|Lmtn|-|4|4 C4|protein-coding	3.5365	1.28025		2.102	3.667	4.082	4.295	1.087	1.355	1.09	1.589	-1.45551	0.000446002
NM_010599	chr11	Kcnab3|C330022D06Rik|Kcnab4|mKv(beta)4|-|11|11 B3|protein-coding	2.15475	0.7785		0.967	2.094	3.072	2.486	0.586	0.718	0.869	0.941	-1.45346	0.00591296
NM_001037493	chr6	Slc41a3|1010001P06Rik|AI480742|SLC41A1-L2|-|6|6 D1|protein-coding	3.79075	1.3895		3.506	3.763	4.476	3.418	1.938	1.453	0.922	1.245	-1.44679	0.000208158
NM_001163833	chr10	Msl3l2|1700060H10Rik|-|10|10 B3|protein-coding	1.274	0.46575		0.982	1.194	1.705	1.215	0.843	0.486	0.253	0.281	-1.44191	0.0432689
NM_010388	chr17	H2-DMb2|H-2Mb2|H2-Mb2|-|17 B1|17 17.98 cM|protein-coding	4.18525	1.53975		3.365	3.821	6.259	3.296	1.341	1.505	1.772	1.541	-1.43853	0.00176981
NM_001085533	chr4	Gm13275|OTTMUSG00000011268|-|4 C4|4|protein-coding	8.5065	3.124		4.945	8.807	10.213	10.061	2.506	3.409	3.033	3.548	-1.43728	2.43259e-05
NM_008492	chr6	Ldhb|AI790582|H-Ldh|LDH-B|LDH-H|Ldh-2|Ldh2|-|6 G2|6 74.17 cM|protein-coding	5.46325	1.99675		2.35	6.408	8.06	5.035	1.782	1.968	1.623	2.614	-1.43701	0.00747191
NM_133914	chr5	Rasa4|AA793972|AW112107|BB079060|CAPRI|GAPL|-|5|5 G2|protein-coding	136.605	50.039		44.841	138.395	218.971	144.213	35.666	35.315	90.392	38.783	-1.43343	0.0424169
NM_008338	chr16	Ifngr2|Ifgr2|Ifgt|-|16 C3.3|16 53.07 cM|protein-coding	8.639	3.20325		7.796	9.422	9.971	7.367	3.776	3.527	2.678	2.832	-1.43106	2.34876e-07
NM_027872	chr5	Slc46a3|1200006F02Rik|-|5|5 G3|protein-coding	1.8505	0.688		2.194	1.659	1.982	1.567	1.015	0.472	0.734	0.531	-1.42955	0.00442119
NM_001146059	chr9	Als2cl|79H19D|79H19E|BC022645|D930044G19Rik|mRn.49018|-|9 F2|9 60.79 cM|protein-coding	5.34125	1.9805		3.943	3.516	9.131	4.775	2.087	1.894	1.844	2.097	-1.42853	0.000465215
NM_023326	chr2	Bmyc|2900002K07Rik|AW060705|Mycb|-|2|2 A3|protein-coding	5.188	1.92		3.503	6.258	4.897	6.094	1.677	2.039	1.36	2.604	-1.42451	0.0011756
NM_001039534	chr7	Pstk|5430423O14Rik|5730458D16Rik|Gm1099|R75284|-|7|7 F3|protein-coding	8.60625	3.23125		8.067	8.693	8.726	8.939	3.182	3.706	2.971	3.066	-1.41715	1.33269e-07
NM_011303	chr4	Dhrs3|Rsdr1|retSDR1|-|4|4 E1|protein-coding	22.2547	8.14475		7.218	22.662	38.434	20.705	5.593	9.251	8.799	8.936	-1.41637	0.0197244
NM_001177833	chr2	Smox|B130066H01Rik|PAO|PAOh1|SMO|-|2|2 F1|protein-coding	12.7285	4.93275		7.412	16.556	9.407	17.539	2.849	6.276	4.68	5.926	-1.41592	0.00174749
NR_024599	chr13	Gm11346|5830431A10Rik|AI447617|Gm11347|OTTMUSG00000000601|OTTMUSG00000000602|-|13|13 A3.1|pseudo	3.08375	1.1515		1.578	2.706	5.323	2.728	0.68	1.505	1.294	1.127	-1.4153	0.0310765
NM_172442	chr19	Dtx4|AI449438|BC044798|D930042H13|RNF155|-|19|19 A|protein-coding	4.8755	1.8195		2.599	4.362	6.923	5.618	1.633	1.518	2.209	1.918	-1.40916	0.000199345
NM_018872	chr1	Tmem131|2610524E03Rik|CC28|D1Bwg0491e|Neg|RW1|YR-23|mKIAA0257|-|1 B|1 15.42 cM|protein-coding	61.451	23.0207		32.655	59.833	81.112	72.204	18.318	22.399	24.189	27.177	-1.40827	6.78168e-06
NM_177075	chr11	Fndc9|C030019I05Rik|-|11|11 B1.1|protein-coding	1.69925	0.64		0.986	1.835	2.595	1.381	0.574	0.756	0.505	0.725	-1.40064	0.00737388
NM_010623	chr4	Kif17|5930435E01Rik|AW492270|Kif17b|mKIAA1405|-|4|4 D3|protein-coding	4.6715	1.766		4.68	4.133	4.746	5.127	2.724	1.452	1.466	1.422	-1.39873	0.000441527
NM_001085518	chr2	Gm14085|OTTMUSG00000015615|-|2|2 E5|protein-coding	9.19275	3.4635		5.433	9.097	12.401	9.84	3.671	3.72	3.427	3.036	-1.39749	4.87674e-06
NM_009325	chr10	Tbxa2r|TP|TXA2-R|-|10 C1|10 39.72 cM|protein-coding	37.1365	14.0065		11.773	40.661	51.803	44.309	6.965	16.396	15.872	16.793	-1.3965	0.0223669
NM_001276764	chr1	Dst|2310001O04Rik|A830042E19Rik|AW554249|BP230|BPAG1-n|Bpag|Bpag1|Macf2|ah|athetoid|dt|mKIAA0728|nmf203|nmf339|-|1 B|1 12.91 cM|protein-coding	6.70775	2.531		5.327	4.263	11.494	5.747	2.295	1.687	3.981	2.161	-1.39641	0.00480204
NM_027835	chr2	Ifih1|9130009C22Rik|Helicard|Hlcd|MDA5|RLR-2|-|2|2 C1.3|protein-coding	3.18875	1.2155		3.412	2.751	3.596	2.996	1.572	1.242	0.883	1.165	-1.39556	1.00723e-05
NR_028416	chr7	D630041G03Rik|-|-|7|7 A1|ncRNA	1.5035	0.57		0.987	1.899	0.882	2.246	0.495	0.672	0.371	0.742	-1.39044	0.015388
NM_181584	chrX	Gab3|5930433H21Rik|-|X|X A7.3|protein-coding	4.1145	1.56225		2.79	3.168	6.831	3.669	1.722	1.094	1.859	1.574	-1.38638	0.00506652
NM_007642	chr1	Cd28|-|-|1 C2|1 30.52 cM|protein-coding	7.27825	2.754		2.815	7.241	11.968	7.089	2.006	2.137	4.127	2.746	-1.38625	0.0184298
NM_001085532	chr4	Gm13276|OTTMUSG00000011269|-|4 C4|4|protein-coding	4.15275	1.5815		2.515	4.08	4.907	5.109	1.383	1.653	1.439	1.851	-1.38303	0.000417527
NM_001329619	chr17	Enpp5|AW061004|D17Abb1e|E-NPP 5|-|17 B3|17 20.3 cM|protein-coding	1.09425	0.45375		0.981	0.869	1.672	0.855	0.496	0.389	0.555	0.375	-1.38157	0.0085753
NR_117093	chr19	Map4k2|AI385662|BL44|GCK|Rab8ip|-|19|19 A|protein-coding	38.4237	14.6785		26.132	40.308	44.504	42.751	14.38	15.167	14.523	14.644	-1.38018	2.28259e-12
NM_026146	chr7	Eps8l1|2310051G19Rik|4632407K17Rik|AW060268|DRC3|EPS8R1|-|7|7 A1|protein-coding	9.812	3.76475		5.505	13.675	6.324	13.744	2.478	5.027	2.407	5.147	-1.37847	0.010208
NM_172543	chr11	Fam117a|5730593F17Rik|AW548096|-|11|11 D|protein-coding	38.7585	14.9262		20.531	43.422	42.534	48.547	10.277	16.337	16.372	16.719	-1.36933	1.77176e-05
NM_001098841	chr4	Gm13278|OTTMUSG00000011272|-|4 C4|4|protein-coding	8.555	3.297		5.3	8.719	9.813	10.388	2.766	3.49	3.043	3.889	-1.36812	3.30734e-05
NM_001162921	chr9	Zc3h12c|A230108E06|C230027N18Rik|mKIAA1726|-|9|9 A5.3|protein-coding	1.0875	0.42025		0.715	1.03	1.249	1.356	0.347	0.421	0.441	0.472	-1.36363	0.000190263
NM_010090	chr2	Dusp2|PAC1|-|2|2 F1|protein-coding	77.9285	30.0998		41.416	97.292	66.692	106.314	30.019	36.204	19.318	34.858	-1.36062	0.000320958
NM_177260	chr3	Tmem154|9930117H01Rik|-|3|3 F1|protein-coding	5.2685	2.06125		4.239	4.848	7.332	4.655	2.941	1.689	2.052	1.563	-1.34283	0.000598882
NR_138565	chr19	Tcf7l2|TCF4B|TCF4E|Tcf-4|Tcf4|-|19 D2|19 51.59 cM|protein-coding	3.0495	1.188		1.945	3.882	2.731	3.64	1.165	1.31	0.827	1.45	-1.34149	0.000438255
NR_102383	chr5	5930430L01Rik|-|-|5|5 G3|ncRNA	3.15675	1.256		1.588	2.723	4.839	3.477	0.94	1.231	1.254	1.599	-1.33711	0.00504004
NM_001167680	chr11	Rhbdf2|4732465I17Rik|Rhbdl6|cub|-|11|11 E2|protein-coding	5.152	2.03675		4.347	5.241	4.096	6.924	2.575	1.941	1.697	1.934	-1.33113	2.86192e-05
NM_001098840	chr4	Gm13277|OTTMUSG00000011270|-|4 C4|4|protein-coding	4.00075	1.58175		2.443	3.983	4.695	4.882	1.408	1.607	1.48	1.832	-1.32847	0.000682783
NM_027373	chr5	Afap1|2600003E23Rik|9630044L16Rik|AI848729|Afap|mKIAA3018|-|5|5 B3|protein-coding	3.4715	1.37925		1.43	4.291	4.027	4.138	0.901	1.823	1.214	1.579	-1.32322	0.00653166
NM_172514	chr15	Tmem71|AI661017|E430024D12|-|15|15 D2|protein-coding	5.55625	2.22125		2.945	5.9	6.977	6.403	1.222	2.8	2.405	2.458	-1.31937	0.00288878
NM_001113353	chr17	Synj2|AI481647|SJ2|mKIAA0348|-|17 A1|17 3.59 cM|protein-coding	8.13725	3.33475		6.26	6.861	11.066	8.362	4.416	2.24	3.942	2.741	-1.31466	0.000342876
NM_001243167	chr4	Gm13288|OTTMUSG00000011289|-|4 C4|4|protein-coding	2.172	0.8675		1.317	2.228	2.428	2.715	0.709	0.894	0.832	1.035	-1.31403	0.00083669
NM_001285529	chr4	Tle1|C230057C06Rik|Estm14|Grg-1|Grg1|Tle4l|-|4|4 C3|protein-coding	3.25575	1.2125		4.668	2.782	2.467	3.106	1.621	1.267	0.761	1.201	-1.31036	0.00676143
NM_028982	chr6	Fam234b|8430419L09Rik|Kiaa1467|mKIAA1467|-|6|6 G1|protein-coding	8.60375	3.449		4.869	9.176	11.912	8.458	3.9	3.259	3.326	3.311	-1.30463	6.92803e-05
NM_028696	chr1	Nabp1|4930434H03Rik|4930442A21Rik|4930488J04Rik|4933440J18Rik|5830411E10Rik|AI852561|Nbp1|Obfc2a|Ssb2|-|1|1 C1.1|protein-coding	34.2355	13.9173		18.255	35.202	52.916	30.569	9.217	16.26	16.715	13.477	-1.30181	0.000859139
NM_026796	chr1	Smyd2|1110020E07Rik|4930402C15|KMT3C|Zmynd14|-|1|1 H6|protein-coding	19.099	7.841		23.362	19.31	15.574	18.15	8.991	8.718	5.374	8.281	-1.29589	2.89785e-05
NM_028711	chr17	Slc25a27|3632410G24Rik|9430092A03Rik|D530043E16Rik|Ucp4|-|17|17 B3|protein-coding	5.5075	2.23575		3.125	5.138	8.268	5.499	1.441	2.441	2.859	2.202	-1.29578	0.00360016
NM_027687	chr18	Cabyr|1700016C01Rik|4933421A18Rik|CBP86|FSP-2|-|18|18 A1|protein-coding	2.17025	0.856		1.52	2.11	3.556	1.495	0.697	0.959	0.882	0.886	-1.29299	0.00936252
NM_009728	chr7	Atp10a|Atp10c|pfatp|-|7|7 B5|protein-coding	6.338	2.589		7.884	5.68	5.315	6.473	4.519	2.411	1.267	2.159	-1.29041	0.0198081
NM_008620	chr5	Gbp4|AW228052|Mag-2|Mpa-2|Mpa2|-|5 E5|5 50.68 cM|protein-coding	81.0502	33.0932		61.735	64.636	130.498	67.332	29.83	26.017	48.57	27.956	-1.28803	0.00145596
NM_001347711	chr10	Syne1|8B|A330049M09Rik|BE692247|C130039F11Rik|CPG2|Myne1|mKIAA1756|myne-1|-|10|10 A1|protein-coding	5.43	1.94075		2.379	5.222	8.993	5.126	2.198	1.527	2.567	1.471	-1.28686	0.0256356
NM_010591	chr4	Jun|AP-1|Junc|c-jun|-|4 C5|4 43.34 cM|protein-coding	30.8747	12.4787		24.384	37.227	34.317	27.571	22.022	10.669	8.254	8.97	-1.28646	0.0048846
NM_028757	chr2	Nebl|1200007O21Rik|A630080F05Rik|BB140644|D830029A09Rik|Lnebl|-|2|2 A3|protein-coding	3.15775	1.29675		2.982	2.672	4.31	2.667	1.601	1.218	1.101	1.267	-1.28492	0.000521057
NM_008384	chr1	Inpp1|2300002C06Rik|AV137389|-|1 C1.1|1 26.99 cM|protein-coding	9.77525	3.9955		6.071	10.494	13.157	9.379	3.611	4.686	3.839	3.846	-1.28471	6.95675e-05
NM_133984	chr9	Hemk1|2310008M14Rik|AW049265|-|9|9 F1|protein-coding	4.31675	1.78125		4.639	4.24	4.287	4.101	1.867	1.859	1.898	1.501	-1.28377	1.24962e-05
NM_001177844	chr2	Frmd4a|2700017I06Rik|5330420J21|AI594879|C230040M21Rik|Frmd4|Gm13190|OTTMUSG00000010806|mKIAA1294|-|2|2 A1|protein-coding	16.9385	6.9085		10.183	18.096	18.811	20.664	7.049	7.27	6.122	7.193	-1.28329	1.50722e-07
NM_001110508	chr8	Zfp703|1110032O19Rik|AI430822|AL022941|Csmn1|End2|Zeppo1|Znf703|Zpo1|-|8|8 A2|protein-coding	10.083	4.122		5.686	12.778	7.59	14.278	3.345	5.586	2.217	5.34	-1.28018	0.0136089
NM_053262	chr5	Hsd17b11|Dhrs8|Pan1b|SDR2|retSDR2|-|5|5 E5|protein-coding	36.1538	14.841		26.863	37.364	46.852	33.536	15.671	16.434	14.024	13.235	-1.28006	3.32141e-08
NM_008321	chr4	Id3|Hlh462|Idb3|bHLHb25|-|4 D3|4 68.34 cM|protein-coding	24.254	10.0367		17.945	32.445	22.427	24.199	7.488	14.596	5.316	12.747	-1.27752	0.00465329
NM_028705	chr6	Herc3|5730409F18Rik|AI646603|mKIAA0032|-|6|6 B3|protein-coding	7.48325	3.07575		4.638	6.873	12.246	6.176	2.383	2.537	4.709	2.674	-1.27524	0.0074817
NM_030710	chr1	Slamf6|KAL1|KAL1b|Ly108|NTB-A|NTBA|SF2000|-|1 H3|1 79.54 cM|protein-coding	5.835	2.47625		3.365	5.406	9.56	5.009	1.283	3.377	2.44	2.805	-1.27135	0.0226602
NM_009450	chr13	Tubb2a|M(beta)2|Tubb2|-|13 A3.3|13 14.03 cM|protein-coding	16.734	6.97		11.002	25.342	11.487	19.105	5.469	10.589	3.167	8.655	-1.26366	0.0342381
NM_174846	chr9	Glyctk|6230410P16Rik|C430006L12|-|9|9 F1|protein-coding	2.79075	1.15675		1.695	2.777	3.953	2.738	0.821	1.255	1.161	1.39	-1.25301	0.00169661
NM_025778	chr6	Bcl2l14|4930452K23Rik|4933405K19Rik|9030625M01Rik|AI429211|Bclg|-|6|6 G1|protein-coding	12.0508	5.08		12.436	11.812	12.044	11.911	4.971	5.516	4.898	4.935	-1.25295	1.67535e-09
NM_026960	chr15	Gsdmd|1810036L03Rik|AW558049|DF5L|Dfna5l|Gsdmdc1|M2-4|-|15|15 D3|protein-coding	14.846	6.228		13.084	15.115	14.195	16.99	6.826	6.499	4.918	6.669	-1.25226	1.22571e-07
NM_016753	chr3	Lxn|-|-|3 E1|3 30.98 cM|protein-coding	17.9423	7.53025		15.838	18.665	17.962	19.304	9.041	7.943	5.286	7.851	-1.25076	7.83481e-06
NM_007649	chr1	Cd48|AI449234|AW610730|BCM1|BLAST|BLAST-1|BLAST1|Bcm-1|MEM-102|SLAMF2|Sgp-60|-|1 H3|1 79.54 cM|protein-coding	78.3657	33.139		118.162	75.112	47.237	72.952	52.05	27.398	27.439	25.669	-1.24935	0.013912
NM_001159407	chr16	B3gnt5|beta3GnT5|-|16|16 A3|protein-coding	3.67975	1.565		4.276	3.62	2.751	4.072	2.007	1.601	0.892	1.76	-1.24595	0.00253303
NM_001033343	chr19	Sec31b|Gm341|Sec31l2|-|19|19 C3|protein-coding	2.13375	0.8935		1.144	1.729	3.486	2.176	0.768	0.757	1.125	0.924	-1.24417	0.0186212
NM_028994	chr14	Pck2|1810010O14Rik|9130022B02Rik|PEPCK-M|-|14 C3|14 28.19 cM|protein-coding	17.198	7.23425		15.102	18.847	13.78	21.063	11.018	6.853	4.295	6.771	-1.23769	0.00150521
NM_011923	chr2	Angptl2|AI593246|AW260363|Arp2|-|2|2 B|protein-coding	26.9632	11.4045		30.185	27.403	22.795	27.47	17.707	10.147	7.978	9.786	-1.23754	0.000456574
NM_080575	chr2	Acss1|1110032O15Rik|AI788978|Acas2|Acas2l|AceCS2|-|2|2 G3|protein-coding	23.874	10.078		11.985	28.304	24.036	31.171	6.767	11.611	10.003	11.931	-1.23683	0.000650453
NM_001109661	chr4	Bach2|E030004N02Rik|-|4|4 A5|protein-coding	4.96525	2.0955		3.215	5.157	5.484	6.005	2.221	1.958	2.149	2.054	-1.23307	1.07102e-06
NM_001145920	chr17	Runx2|AML3|Cbf|Cbfa-1|Cbfa1|LS3|Osf2|PEBP2aA|Pebp2a1|Pebpa2a|-|17 B3|17 21.33 cM|protein-coding	5.5885	2.40375		5.097	6.185	4.077	6.995	2.185	3.304	1.572	2.554	-1.23012	0.00027903
NM_008339	chr11	Cd79b|B29|Ig-beta|Igb|Igbeta|-|11 E1|11 68.89 cM|protein-coding	5.694	2.50625		5.966	5.438	6.971	4.401	2.611	2.656	1.944	2.814	-1.21867	0.00171814
NM_011056	chr13	Pde4d|9630011N22Rik|Dpde3|-|13 D2.1|13 59.69 cM|protein-coding	5.38025	2.304		3.706	5.968	5.741	6.106	2.465	2.516	1.95	2.285	-1.2156	5.84914e-07
NR_029475	chr9	4930581F22Rik|-|-|9|9 A4|ncRNA	8.33525	3.58025		5.601	8.282	11.024	8.434	3.113	3.957	3.631	3.62	-1.21492	3.07748e-05
NM_175449	chr10	Fam26f|A630077B13Rik|-|10|10 B1|protein-coding	3.23675	1.39925		2.626	4.142	2.261	3.918	1.404	2.113	0.891	1.189	-1.21075	0.0333897
NM_021494	chr7	Dennd5a|1500012B19Rik|AJ245569|AW496491|ORF37|Rab6ip1|mKIAA1091|-|7|7 E3|protein-coding	7.56075	3.276		7.38	8.639	5.377	8.847	3.442	3.622	2.477	3.563	-1.20889	1.43166e-05
NM_011909	chr6	Usp18|1110058H21Rik|AW047653|UBP43|Ubp15|-|6 F1|6 57.17 cM|protein-coding	5.18875	2.25175		4.205	5.563	5.318	5.669	2.173	2.763	1.775	2.296	-1.20455	8.57471e-05
NR_026843	chr4	Bach2os|-|-|4|4 A5|ncRNA	1.50325	0.6475		0.997	1.434	1.565	2.017	0.609	0.546	0.743	0.692	-1.2016	0.0122664
NM_026411	chr10	1700021F05Rik|-|-|10|10 B2|protein-coding	9.04375	3.955		9.139	9.057	8.199	9.78	4.847	4.207	2.791	3.975	-1.19644	0.000663043
NM_172777	chr5	Gbp9|-|-|5|5 E5|protein-coding	47.0395	20.639		29.731	41.543	74.544	42.34	17.678	18.075	29.743	17.06	-1.18071	0.00333644
NM_148939	chr17	Ly6g5b|-|-|17|17 B1|protein-coding	1.37625	0.6105		1.471	1.483	1.527	1.024	0.583	0.574	0.714	0.571	-1.17353	0.0199264
NM_025508	chr13	Gmpr|2310004P21Rik|AV028449|GMPR 1|-|13|13 A5|protein-coding	8.4115	3.71725		7.449	9.461	6.768	9.968	5.062	4.111	2.193	3.503	-1.17297	0.00454669
NM_023908	chr7	Slco3a1|5830414C08Rik|Anr1|MJAM|OATP-D|R75096|Slc21a11|-|7|7 D1|protein-coding	5.012	2.1765		4.212	5.619	3.83	6.387	2.141	2.544	1.508	2.513	-1.17148	5.50648e-05
NM_201354	chr18	Ctif|Gm672|-|18|18 E3|protein-coding	1.73425	0.767		0.769	1.868	2.057	2.243	0.438	0.88	0.662	1.088	-1.16956	0.0471942
NR_003507	chr5	Oas1b|Flv|L1|Mmu-L1|Oas1|Oias-2|Oias2|Wnv|-|5 F|5 60.64 cM|protein-coding	4.33225	1.91225		2.957	3.668	5.881	4.823	1.302	2.147	2.333	1.867	-1.16485	0.00567176
NM_011785	chr1	Akt3|AI851531|D930002M15Rik|Nmf350|-|1|1 H4|protein-coding	5.08275	2.25		3.282	5.428	5.603	6.018	2.397	2.058	2.453	2.092	-1.16322	4.69558e-05
NM_011027	chr5	P2rx7|AI467586|P2X(7)|P2X7R|-|5|5 F|protein-coding	7.91275	3.54925		6.869	8.217	7.276	9.289	3.472	3.202	4.724	2.799	-1.15845	6.17755e-05
NM_177662	chr3	Ctso|A330105D01Rik|AI118514|-|3|3 E3|protein-coding	4.66375	2.09525		3.555	5.236	5.274	4.59	2.021	2.422	2.108	1.83	-1.15115	1.37858e-05
NM_001277076	chr1	Fer1l5|4930533C12Rik|-|1|1 B|protein-coding	1.523	0.6825		0.891	1.414	2.143	1.644	0.656	0.711	0.623	0.74	-1.14922	0.0040628
NM_001039581	chr17	Abca3|1810036E22Rik|ABC-C|Abc3|-|17|17 A3.3|protein-coding	3.9725	1.79675		3.135	3.832	4.552	4.371	1.583	1.951	1.714	1.939	-1.14417	6.73877e-07
NM_026376	chr6	Plxnd1|6230425C21Rik|b2b1863Clo|b2b553Clo|-|6|6 E3|protein-coding	9.5505	4.31975		7.827	11.643	7.174	11.558	4.569	5.643	2.468	4.599	-1.14356	0.00137194
NM_172980	chr2	Slc28a2|2010208B10Rik|B430217P18|BB152493|Cnt2|-|2|2 E5|protein-coding	15.3797	6.92875		10.308	15.568	18.85	16.793	7.247	7.256	6.637	6.575	-1.14222	9.80491e-07
NM_001042710	chr10	Prss57|2900092M14Rik|GLGL782|NSP4|Prssl1|UNQ782|-|10|10 C1|protein-coding	25.5785	11.5505		30.672	19.261	32.339	20.042	20.766	8.145	8.913	8.378	-1.14144	0.0488053
NM_001004155	chr14	9930012K11Rik|-|-|14|14 D2|protein-coding	5.15	2.33275		3.673	5.61	5.229	6.088	2.132	3.203	1.775	2.221	-1.1411	0.0014436
NM_173019	chr9	Pfkfb4|C230090D14|-|9|9 F2|protein-coding	3.15225	1.431		2.367	3.623	3.293	3.326	1.088	1.603	1.516	1.517	-1.13686	0.000173848
NM_001039647	chr5	Gbp11|EG634650|Gm7141|-|5|5 E5|protein-coding	30.2933	13.7602		24.121	21.682	50.735	24.635	12.541	10.853	20.149	11.498	-1.13586	0.0139945
NM_134156	chr12	Actn1|3110023F10Rik|Actn1a|-|12 C3|12 36.49 cM|protein-coding	48.418	22.1495		37.491	47.993	58.377	49.811	18.966	28.328	15.597	25.707	-1.13212	1.22455e-05
NR_003519	chr17	Pisd-ps2|D030013I16Rik|-|17|17 A1|pseudo	58.0235	26.4485		27.969	68.543	60.838	74.744	15.247	31.575	24.252	34.72	-1.12883	0.011259
NM_029509	chr5	Gbp8|5830443L24Rik|mGBP8|-|5|5 E5|protein-coding	83.689	38.1307		56.966	69.248	138.348	70.194	33.617	32.407	55.844	30.655	-1.12776	0.0106224
NM_018775	chr1	Tbc1d8|AD3|HBLP1|VRP|-|1|1 B|protein-coding	2.71325	1.2325		1.579	2.969	3.123	3.182	1.281	1.328	1.073	1.248	-1.12717	0.00146607
NM_029865	chr8	Ocel1|9430098E02Rik|AI326022|AI593544|-|8|8 B3.3|protein-coding	10.0635	4.6265		6.672	11.001	11.042	11.539	3.371	4.844	4.557	5.734	-1.1169	0.000479694
NM_144533	chr9	Nmnat3|4933408N02Rik|PNAT3|-|9|9 E3.3|protein-coding	9.264	4.2625		5.186	10.221	11.853	9.796	3.448	4.948	4.473	4.181	-1.11234	0.00153483
NM_027327	chrX	2210013O21Rik|AI181827|Thp5|-|X|X F3|protein-coding	23.4943	10.85		17.485	26.055	26.501	23.936	9.792	12.179	10.871	10.558	-1.11143	7.18156e-06
NM_008940	chr7	Klk8|BSP1|NP|Nrpn|Prss19|-|7 B3|7 28.26 cM|protein-coding	9.8295	4.57475		13.696	9.063	6.165	10.394	6.012	4.009	4.116	4.162	-1.10561	0.0262011
NM_011158	chr12	Prkar2b|AI451071|AW061005|PKARIIbeta|Pkarb2|RII(beta)|-|12|12 A3|protein-coding	18.5057	8.60775		18.94	17.67	22.426	14.987	11.58	8.533	7.435	6.883	-1.1036	0.000224351
NM_177687	chr6	Crebl2|AI046348|B230205M03|-|6|6 G1|protein-coding	4.03	1.86575		1.907	4.722	5.43	4.061	1.197	1.987	2.23	2.049	-1.10079	0.0349042
NM_001159963	chr5	Fbxl5|Fbl4|Fir4|-|5|5 B3|protein-coding	20.9905	9.7335		10.846	23.316	27.459	22.341	7.265	10.598	11.675	9.396	-1.09998	0.00215392
NM_001008549	chr7	Zfp658|-|-|7|7 B3|protein-coding	4.607	2.14425		3.395	4.968	5.679	4.386	2.072	1.986	2.587	1.932	-1.09618	0.000256454
NM_178695	chr2	Prrg4|9930111I18Rik|TMG4|-|2|2 E2|protein-coding	7.75525	3.62825		6.955	4.944	13.091	6.031	3.834	2.68	4.693	3.306	-1.09488	0.0380064
NM_175124	chr7	Lrrc28|1300004K21Rik|2210012C09Rik|2310058O11Rik|-|7|7 C|protein-coding	3.639	1.70025		2.609	3.979	4.154	3.814	1.864	1.899	1.318	1.72	-1.09465	0.000757398
NR_003517	chr11	Pisd-ps1|-|-|11 A1|11|pseudo	63.806	29.7907		31.567	74.738	64.986	83.933	17.441	34.808	29.516	37.398	-1.09376	0.0100468
NR_003518	chr11	Pisd-ps3|4933439C20Rik|-|-|pseudo	63.705	29.7952		31.517	74.574	64.832	83.897	17.464	34.859	29.451	37.407	-1.09125	0.0102872
NM_030258	chr5	Gpr146|BC003323|PGR8|-|5|5 G2|protein-coding	2.70425	1.2575		2.285	2.626	2.956	2.95	2.041	0.866	1.263	0.86	-1.08857	0.0336428
NR_003967	chr7	Gm4759|EG209380|-|7|7 E3|pseudo	5.42425	2.54975		3.633	4.005	7.345	6.714	2.252	2.137	3.08	2.73	-1.08189	0.00647406
NM_029097	chr4	Atp13a2|1110012E06Rik|AA589443|-|4|4 D3|protein-coding	43.937	20.5763		21.258	48.981	51.095	54.414	17.76	24.615	15.76	24.17	-1.08079	0.00365325
NM_145853	chr5	Tpcn1|5730403B01Rik|Tpc1|mKIAA1169|-|5|5 F|protein-coding	23.0495	10.871		16.16	20.042	33.136	22.86	11.15	9.852	11.726	10.756	-1.07735	7.33608e-05
NM_175442	chrX	A630033H20Rik|AI662791|P2ry10|-|X|X D|protein-coding	2.1075	0.99675		1.62	2.214	2.392	2.204	1.108	1.03	0.792	1.057	-1.07167	0.00265069
NM_030018	chr16	Tmem50b|AU015466|AU019872|B230114J08Rik|-|16|16 C3.3|protein-coding	18.4005	8.7975		15.422	17.597	25.364	15.219	7.229	10.128	8.527	9.306	-1.06944	8.01109e-05
NM_001081213	chr19	Ermp1|D19Ertd410e|D19Wsu12e|Fxna|mKIAA1815|-|19 C1|19 24.17 cM|protein-coding	20.0663	9.56625		14.264	19.823	24.82	21.358	10.896	9.745	8.33	9.294	-1.06065	2.98812e-06
NM_001110150	chr11	Mgat1|Mgat-1|-|11 B1.2|11 29.27 cM|protein-coding	76.4865	36.2555		53.115	82.738	87.054	83.039	36.493	39.922	32.204	36.403	-1.05925	1.68808e-07
NM_172751	chr8	Arhgef10|6430549H08Rik|mKIAA0294|-|8|8 A1.1|protein-coding	1.547	0.75175		1.671	1.765	1.187	1.565	0.824	0.977	0.446	0.76	-1.05801	0.0180441
NM_023056	chr6	Tmem176b|1810009M01Rik|Clast1|Lr8|-|6 B2.3|6 23.75 cM|protein-coding	70.2202	33.7182		80.666	61.467	76.08	62.668	46.444	27.618	33.456	27.355	-1.05666	0.000604144
NM_010156	chr6	Samd9l|AA175286|ESTM25|mKIAA2005|-|6 A1|6 1.76 cM|protein-coding	2.40875	1.165		2.117	2.821	2.022	2.675	0.683	1.453	1.054	1.47	-1.05528	0.00607426
NM_011487	chr1	Stat4|-|-|1 C1.1|1 26.67 cM|protein-coding	30.9367	14.8658		21.616	30.943	37.38	33.808	14.727	17.279	12.353	15.104	-1.05482	2.62496e-06
NM_030180	chr14	Usp54|4930429G18Rik|AI115571|C030002J06Rik|-|14|14 A3|protein-coding	3.76925	1.812		2.329	3.389	5.111	4.248	1.481	2.034	1.891	1.842	-1.05203	0.00179928
NM_007707	chr11	Socs3|Cis3|Cish3|EF-10|Ef10|SSI-3|Ssi3|-|11|11 E2|protein-coding	19.0583	9.148		11.67	19.502	27.726	17.335	9.75	8.794	9.022	9.026	-1.04853	0.00106022
NM_201245	chr11	Mprip|9530046C02|AA536749|AI647711|C76423|RIP3|Rhoip3|mKIAA0864|p116Rip|-|11|11 B1.3|protein-coding	33.822	16.2965		22.699	34.872	41.883	35.834	15.987	17.501	13.784	17.914	-1.0479	6.95795e-06
NM_011609	chr6	Tnfrsf1a|CD120a|FPF|TNF-R|TNF-R-I|TNF-R1|TNF-R55|TNF-alphaR1|TNFAR|TNFR60|TNFRI|TNFRp55|TNFalpha-R1|Tnfr-2|Tnfr1|p55|p55-R|-|6 F3|6 59.32 cM|protein-coding	11.0132	5.2985		8.342	14.353	9.043	12.315	6.019	5.534	4.41	5.231	-1.04685	0.000506825
NM_172145	chr4	Eva1b|2610027C15Rik|Fam176b|-|4|4 D2.2|protein-coding	4.27225	2.061		2.374	5.819	4.749	4.147	1.539	2.862	2.055	1.788	-1.04438	0.0479031
NM_178931	chr4	Tnfrsf14|Atar|HveA|Hvem|Tnfrs14|-|4|4 E2|protein-coding	15.9145	7.70975		9.826	15.851	21.317	16.664	5.591	7.209	9.513	8.526	-1.03887	0.00828342
NM_001305186	chr7	Plekha7|A430081P20Rik|AI414265|-|7|7 F1|protein-coding	38.9357	18.8573		24.16	44.225	36.21	51.148	17.408	22.692	13.603	21.726	-1.03812	0.00109709
NM_011774	chr2	Slc30a4|Znt4|lm|znT-4|-|2 E5|2 60.65 cM|protein-coding	9.42975	4.61425		9.585	8.415	12.205	7.514	5.323	4.698	4.258	4.178	-1.03615	0.000124803
NM_001242427	chr17	Slc37a1|G3PP|-|17|17 A3.3|protein-coding	5.47325	2.664		4.472	5.131	6.933	5.357	3.193	2.617	2.388	2.458	-1.03432	0.000438255
NM_173429	chr6	Zfp775|C130032F08Rik|Znf775|-|6|6 B2.3|protein-coding	4.4645	2.169		3.207	4.821	4.781	5.049	2.155	2.086	2.074	2.361	-1.03422	7.68021e-05
NM_001161609	chr4	Gm13285|OTTMUSG00000011282|limitin|-|4 C4|4|protein-coding	20.3657	9.9565		16.916	16.389	26.457	21.701	9.881	11.147	10.969	7.829	-1.03273	0.0033829
NM_001289470	chr1	Cd84|A130013D22Rik|CDw84|SLAMF5|-|1 H3|1 79.54 cM|protein-coding	14.7718	7.21575		9.316	14.258	20.051	15.462	5.485	8.83	6.809	7.739	-1.03242	0.00101748
NM_001103178	chr19	Ablim1|2210411C18Rik|2610209L21Rik|4833406P10Rik|9330196J19Rik|AV079770|AW060987|AW215784|Limab1|mKIAA0059|-|19 D2|19 52.09 cM|protein-coding	74.305	36.2118		44.667	70.317	103.524	78.712	26.992	36.976	43.458	37.421	-1.03235	0.00144726
NM_207530	chr18	Osbpl1a|G430090F17Rik|Gm753|ORP-1|Osbpl1b|-|18|18 A1|protein-coding	18.9632	9.016		17.282	12.589	33.583	12.399	8.298	8.177	11.984	7.605	-1.02521	0.0264525
NM_011206	chr1	Ptpn18|FLP1|HSCF|PTP-HSCF|PTP-K1|Ptpk1|-|1 B|1 13.25 cM|protein-coding	33.937	16.697		31.586	35.048	34.11	35.004	18.572	17.656	13.766	16.794	-1.0239	1.80197e-07
NM_145154	chr9	Angptl6|6330404E11Rik|AGF|ARP3|Arp5|-|9|9 A3|protein-coding	4.95375	2.43175		3.487	5.807	5.394	5.127	1.876	2.734	2.68	2.437	-1.0216	0.00398812
NM_001253783	chr8	Def8|AI449518|D8Ertd713e|DEF-8|-|8 E1|8 72.1 cM|protein-coding	17.2303	8.4555		14.822	17.755	18.12	18.224	9.553	8.571	7.317	8.381	-1.02118	5.29656e-08
NM_001101433	chr14	Zcchc24|2310047A01Rik|-|14|14 A3|protein-coding	12.901	6.32075		6.238	16.428	13.36	15.578	5.294	7.582	5.485	6.922	-1.01857	0.00708436
NM_175465	chr2	Sestd1|1500031J16Rik|A930010O20|Solo/Trio8|-|2|2 C3|protein-coding	10.0717	4.95775		8.409	9.225	12.738	9.915	5.804	4.671	4.418	4.938	-1.01823	4.34554e-06
NM_001009935	chr3	Txnip|1200008J08Rik|AA682105|Hyplip1|THIF|Tbp-2|VDUP1|-|3 F2.1|3 41.93 cM|protein-coding	84.092	41.3623		51.738	86.46	112.938	85.232	32.611	39.456	52.637	40.745	-1.01699	0.000997827
NM_020505	chr3	Vav3|A530094I06Rik|AA986410|Idd18.1|-|3|3 F3|protein-coding	9.7505	4.94		9.994	9.768	9.182	10.058	6.438	4.562	3.995	4.765	-1.01598	0.000524955
NM_175337	chr12	Mlh3|AV125803|BB126472|-|12|12 D1|protein-coding	3.2695	1.62025		2.42	2.962	4.48	3.216	1.362	1.674	1.745	1.7	-1.01133	0.00111258
NM_178848	chr13	Sirt5|0610012J09Rik|1500032M05Rik|AV001953|-|13|13 A4|protein-coding	10.5255	5.218		8.007	9.933	12.85	11.312	4.264	5.204	5.836	5.568	-1.01004	0.000576076
NM_010689	chr7	Lat|p36-38|pp36|-|7|7 F3|protein-coding	247.71	122.99		172.113	241.488	328.63	248.609	102.35	127.866	127.465	134.278	-1.00801	2.88045e-05
NM_138603	chrX	Ccdc22|AI481216|DXImx40e|Ppp1r3f|Sfc22|-|X A1.1|X 3.42 cM|protein-coding	9.45925	4.7285		8.331	10.423	9.173	9.91	3.785	5.781	3.849	5.499	-1.00559	0.000176691
NM_178407	chr5	Arap2|Centd1|Gm148|mKIAA0580|-|5|5 C3.1|protein-coding	7.95425	3.94		4.951	6.877	11.952	8.037	4.229	3.681	4.369	3.481	-1.0028	0.00406841
NM_181328	chr12	Slc25a29|C030003J19Rik|CACL|mCACL|-|12|12 F1|protein-coding	3.17575	1.5785		2.075	3.855	3.53	3.243	1.417	1.951	1.302	1.644	-1.00259	0.0141118
NM_019505	chr11	Dgke|C87606|DAGK6|DGK|-|11|11 C|protein-coding	29.5732	14.7177		18.926	28.252	43.254	27.861	12.464	14.607	17.555	14.245	-1.00136	0.00117666

## Sheet: Bcl11b-repressed genes
DEGs defined by Cas9 disruption of Bcl11b in BM-derived DN2b/DN3 cells differentiating in culture: inferred Bcl11b repression targets
			RPKM											Ratio and adjusted pval
Transcript/RepeatID (cmd=analyzeRepeats.pl rna mm9 -count exons -noadj -condenseGenes -d 17326/17326.rsem/17326_STAR_RSEM_mm9_tagdir/ 17828/17828.rsem/17828_STAR_RSEM_mm9_tagdir/ /rothenberg/sulu/data01/common/maile/rnaseq/18857/18857.rsem/18857_STAR_RSEM_mm9_tagdir/ /rothenberg/sulu/data01/common/maile/rnaseq/17813/17813.rsem/17813_STAR_RSEM_mm9_tagdir/ 17345/17345.rsem/17345_STAR_RSEM_mm9_tagdi…	chr	Annotation/Divergence	sgCont AVE	sgBcl11b AVE		sgCont rep1	sgCont rep2	sgCont rep3	sgCont rep4	sgBcl11b rep1	sgBcl11b rep2	sgBcl11b rep3	sgBcl11b rep4	sgCont vs. sgBcl11b Log2 Fold Change	sgCont vs. sgBcl11b adj. p-value	Bcl11b_peaks (annotated to gene)
NM_009544	chr9	Zfp105|AW557864|-|9 F4|9 73.23 cM|protein-coding	0	1.81625		0	0	0	0	1.046	1.509	3.003	1.707	9.89404	6.28861e-21	0
NM_029723	chr2	Dapl1|2310032F03Rik|EEDA|-|2|2 C1.1|protein-coding	0	5.98675		0	0	0	0	0	10.558	2.007	11.382	9.76808	0.000666221	1
NR_040610	chr2	Bcas1os2|1700040N02Rik|-|2|2 H3|ncRNA	0	1.37525		0	0	0	0	1.112	0.546	2.907	0.936	8.72946	5.868e-10	1
NM_010052	chr12	Dlk1|AW742678|DLK-1|DlkI|FA1|Ly107|Peg9|SCP1|ZOG|pG2|pref-1|-|12 F1|12 60.17 cM|protein-coding	0.05425	21.536		0.085	0.049	0.064	0.019	9.881	11.052	45.672	19.539	8.58419	1.65994e-25	1
NM_001190870	chr7	Kcne3|2210017H05Rik|MiRP2|-|7|7 E2|protein-coding	0.01325	5.165		0.026	0	0	0.027	4.957	3.857	6.79	5.056	8.32813	4.58709e-34	1
NM_001142953	chr3	Gm17359|-|-|3|3 E3|protein-coding	0	1.46475		0	0	0	0	3.042	0.348	2.221	0.248	8.24563	2.59719e-05	1
NM_021467	chr1	Tnni1|2700018B22Rik|AI747285|ssTnI|-|1 E4|1 59.28 cM|protein-coding	0.1015	30.679		0.077	0	0.06	0.269	17.613	28.707	43.992	32.404	8.01997	2.5703e-31	1
NR_027652	chr12	Meg3|2900016C05Rik|3110050O07Rik|6330408G06Rik|AI425946|AW108224|D12Bwg1266e|Gtl2|R74756|R75394|-|12 F1|12 60.25 cM|ncRNA	0.02125	5.4175		0.014	0.056	0	0.015	0.89	2.887	9.522	8.371	7.93155	3.59647e-11	0
NM_010746	chr7	Ncr1|Ly94|NKp46|-|7|7 A1|protein-coding	0.00525	1.821		0	0	0.021	0	0.719	1.982	2.744	1.839	7.8689	2.70689e-15	0
NM_001109657	chr11	Gas7|AW124766|B230343A10Rik|Gas7-cb|-|11|11 B3|protein-coding	0.00775	1.99975		0.027	0	0	0.004	2.801	1.122	2.711	1.365	7.81817	6.33007e-18	1
NM_201353	chr18	Slc6a7|AW455934|PROT|-|18|18 E1|protein-coding	0.00525	1.298		0	0.021	0	0	0.282	0.655	3.165	1.09	7.80213	3.33032e-08	1
NM_007491	chr7	Art5|ARTC5|Yac-2|-|7 E2|7 54.71 cM|protein-coding	0.00475	1.4535		0.019	0	0	0	0.079	0.56	4.124	1.051	7.79693	5.48527e-05	0
NM_001177511	chr10	Npffr1|Gm236|Gpr147|NPFF1|NPFF1R|OT7T022|-|10|10 B4|protein-coding	0.015	4.0225		0.06	0	0	0	2.933	3.242	5.599	4.316	7.65396	1.29312e-25	1
NM_008003	chr7	Fgf15|FGF19|-|7|7 F5|protein-coding	0.0115	2.56475		0.015	0	0	0.031	0.98	3.161	3.03	3.088	7.47142	1.35071e-18	0
NM_175535	chr9	Arhgap20|6530403F17Rik|A530023E23Rik|RARhoGAP|mKIAA1391|-|9|9 A5.3|protein-coding	0.0105	1.78975		0.033	0	0.005	0.004	3.815	0.428	2.344	0.572	7.25765	2.14618e-07	0
NR_035440	chr12	Mir1906-1|Mir1906|Mirn1906|mmu-mir-1906|mmu-mir-1906-1|-|12 F1|12 60.26 cM|ncRNA	0	6.0465		0	0	0	0	0.912	1.696	13.291	8.287	6.9823	0.000745852	0
NR_037313	chr12	Mir1906-2|mmu-mir-1906-2|-|X C1|X 39.95 cM|ncRNA	0	5.9515		0	0	0	0	0.912	1.696	12.911	8.287	6.95969	0.000734312	0
NM_018752	chr7	Trpm1|4732499L03Rik|AI606771|Ltrpc1|Mlsn1|-|7 C|7 34.61 cM|protein-coding	0.0285	3.205		0.036	0.037	0.032	0.009	2.314	3.175	3.874	3.457	6.75773	1.81871e-41	1
NM_021544	chr9	Scn5a|Nav1.5|Nav1.5c|SkM1|SkM2|mH1|-|9 F3|9 71.33 cM|protein-coding	0.034	3.537		0.034	0.029	0.04	0.033	0.774	3.619	4.996	4.759	6.65177	5.72316e-21	0
NM_012054	chr13	Aoah|4930433E13Rik|-|13|13 A2|protein-coding	0.02225	1.736		0.056	0	0.033	0	0.97	1.767	2.034	2.173	6.39129	2.71734e-22	0
NM_030060	chr1	Batf3|9130211I03Rik|Snft|-|1|1 H6|protein-coding	0.03	2.654		0.037	0	0.044	0.039	0.51	2.938	4.583	2.585	6.1696	2.6292e-08	1
NM_029784	chr9	Fam81a|6430514L14Rik|-|9|9 D|protein-coding	0.0145	1.0855		0.027	0.012	0	0.019	0.376	0.863	1.859	1.244	6.01743	2.64091e-11	1
NM_001159564	chr2	Itgb6|2210409C20Rik|4831415H04Rik|-|2 C1.2|2 34.81 cM|protein-coding	0.03925	2.674		0.104	0.022	0.019	0.012	2.402	2.682	3.125	2.487	5.98883	7.57692e-18	1
NR_028261	chr12	Rian|5530401N18Rik|C130089L09Rik|Meg8|-|12 F1|12 60.41 cM|ncRNA	0.032	2.01125		0	0.08	0.017	0.031	0.537	1.234	3.583	2.691	5.98844	3.34033e-08	0
NM_001033324	chr9	Zbtb16|AI467657|PLZF|Zfp145|lu|-|9 A5.3|9 26.47 cM|protein-coding	0.908	54.238		0.909	0.791	0.84	1.092	21.259	45.585	91.364	58.744	5.88654	2.91395e-33	1
NM_008100	chr2	Gcg|GLP-1|Glu|PPG|-|2 C1.3|2 35.85 cM|protein-coding	0.0255	1.45975		0	0	0	0.102	0.033	1.578	2.465	1.763	5.61878	0.0040272	1
NM_001098799	chr2	Tox2|AI851523|AV026525|BI987407|Gcx1|RxHMG1|-|2 H2|2|protein-coding	0.39625	17.7862		0.252	0.447	0.538	0.348	5.132	13.268	30.992	21.753	5.48161	9.66767e-17	1
NM_033078	chr6	Klrk1|D6H12S2489E|NKG2-D|Nkg2d|-|6 F3|6 63.44 cM|protein-coding	0.03525	1.51875		0.032	0.065	0.019	0.025	0.298	1.551	2.52	1.706	5.38695	1.32737e-09	1
NM_177087	chr17	Fam179a|4632412N22Rik|-|17|17 E1.3|protein-coding	0.0365	1.45225		0.045	0.031	0.062	0.008	1.853	0.616	2.603	0.737	5.28175	1.95279e-09	0
NM_011463	chr4	Spink4|MPGC60|-|4|4 A5|protein-coding	0.03975	1.777		0	0	0.159	0	0.186	0.952	4.419	1.551	5.19391	0.00365068	1
NM_012009	chr1	Sh2d1b1|EAT-2|EAT-2A|Eat2|Eat2a|Sh2d1b|-|1|1 H3|protein-coding	0.06275	2.5275		0.165	0.025	0.022	0.039	2.273	2.911	1.829	3.097	5.17968	1.18508e-14	1
NM_139206	chr18	Arap3|Centd3|Drag1|E030006K04Rik|cnt-d3|-|18|18 B3|protein-coding	0.08025	2.69575		0.056	0.068	0.101	0.096	1.888	2.556	3.422	2.917	5.05742	1.53933e-38	0
NM_001162980	chr4	1700024P16Rik|C1orf168|Gm620|-|4|4 C6|protein-coding	0.059	1.9285		0.06	0.058	0.091	0.027	1.147	2.199	2.363	2.005	5.01623	1.4719e-21	1
NM_008572	chr14	Mcpt8|BB139338|MMCP-8|-|14 C3|14 28.19 cM|protein-coding	0.926	32.5068		3.277	0.213	0.148	0.066	20.268	41.878	25.457	42.424	5.01608	0.0010611	1
NM_013415	chr11	Atp1b2|Amog|Atpb-2|-|11 B3|11 42.86 cM|protein-coding	0.074	2.3585		0.044	0.084	0.084	0.084	0.269	2.805	2.624	3.736	4.96004	3.94232e-08	0
NM_027283	chr2	Spaca9|1700026L06Rik|MAST|-|2|2 A3|protein-coding	0.05975	1.90375		0.079	0.16	0	0	3.31	1.413	1.536	1.356	4.93721	4.35574e-08	1
NM_001081156	chr4	Trnp1|2300002D11Rik|Trnp|-|4|4 D2.3|protein-coding	0.2045	6.23475		0.048	0.43	0.056	0.284	1.157	9.239	3.764	10.779	4.92808	6.88458e-06	1
NM_013904	chr10	Hey2|CHF1|Herp1|Hrt2|bHLHb32|hesr2|-|10|10 A4|protein-coding	0.03925	1.226		0.042	0.042	0.073	0	0.471	1.274	2.198	0.961	4.91376	3.32141e-08	1
NM_001033499	chr1	Sh2d1b2|EAT-2B|Eat2b|Ert|Sh2d1c|-|1|1 H3|protein-coding	0.03325	1.36125		0.133	0	0	0	1.463	1.531	1.066	1.385	4.84993	4.89635e-10	0
NR_033804	chr7	Art2a-ps|ARTC2|Art2a|Ly92a|Rt-6|Rt6|Rt6-1|-|7 E2|7 54.6 cM|protein-coding	0.032	1.32425		0	0	0	0.128	0	1.909	1.326	2.062	4.83505	0.0334784	1
NM_001347170	chr10	Hmga2|9430083A20Rik|HMGI-C|Hmgic|pg|pygmy|-|10 D2|10 67.94 cM|protein-coding	0.17775	4.9665		0.113	0.22	0.125	0.253	1.632	5.436	6.857	5.941	4.80455	1.43845e-16	1
NM_010371	chr14	Gzmc|AI323531|B10|CCP2|Ctla-5|Ctla5|-|14 C3|14 28.19 cM|protein-coding	0.03525	1.1705		0.141	0	0	0	1.514	0.614	1.907	0.647	4.77172	0.000166365	0
NM_181072	chr9	Myo1e|2310020N23Rik|9130023P14Rik|AA407778|myosin-1e|myr 3|-|9 D|9 39.41 cM|protein-coding	0.78475	21.0035		0.501	1.11	0.534	0.994	11.901	18.913	29.902	23.298	4.74796	2.27709e-30	1
NM_009987	chr9	Cx3cr1|-|-|9|9 F4|protein-coding	0.2025	5.312		0.454	0.066	0.099	0.191	1.932	4.343	9.363	5.61	4.64233	7.30114e-08	1
NM_013465	chr16	Ahsg|-|-|16 B1|16 13.74 cM|protein-coding	0.06775	1.72375		0.226	0.024	0.021	0	0.886	1.291	3.449	1.269	4.52055	0.000729637	1
NM_011662	chr7	Tyrobp|DAP12|KARAP|Ly83|-|7 B1|7 17.45 cM|protein-coding	5.06025	115.048		4.267	4.31	2.429	9.235	98.106	99.968	149.249	112.868	4.50726	9.63658e-24	1
NM_027407	chr1	Ica1l|1700030B17Rik|Als2cr15|-|1|1 C2|protein-coding	0.16725	3.69225		0.069	0.135	0.109	0.356	0.698	4.491	5.227	4.353	4.4768	1.6118e-07	0
NM_146518	chr7	Olfr523|MOR104-4|-|7|7 F4|protein-coding	0.11275	2.77025		0.385	0.037	0	0.029	1.476	2.921	3.876	2.808	4.45664	0.000290245	1
NM_007718	chr9	Ccr1l1|Cmkbr1l1|-|9 F4|9 75.05 cM|protein-coding	0.042	1.016		0.09	0	0.021	0.057	1.532	0.437	1.44	0.655	4.44263	1.53632e-06	0
NM_001198787	chr11	Aatk|AATYK|aatyk1|mKIAA0641|-|11|11 E2|protein-coding	0.15525	3.185		0.162	0.151	0.03	0.278	2.373	2.317	4.795	3.255	4.3454	5.38447e-11	1
NM_001162955	chr16	Gpr15|4933439K08Rik|-|16|16 C1.2|protein-coding	0.06175	1.31275		0.061	0.055	0.024	0.107	0.28	0.806	2.259	1.906	4.3209	1.06148e-05	0
NM_183178	chr17	Fsd1|-|-|17|17 D|protein-coding	0.053	1.081		0.03	0.041	0.125	0.016	0.021	0.967	2.077	1.259	4.29412	0.00564186	0
NM_008368	chr15	Il2rb|CD122|IL-15Rbeta|IL15Rbeta|Il-2/15Rbeta|Il-2Rbeta|p70|-|15 E1|15 37.52 cM|protein-coding	0.452	8.86725		1.25	0.211	0.172	0.175	7.921	6.116	13.413	8.019	4.22261	4.48259e-06	1
NM_011136	chr9	Pou2af1|BOB.1|Bob-1|Bob1|OBF-1|OBF.1|OCA-B|OCAB|-|9|9 A5.3|protein-coding	1.40575	25.3065		0.676	1.551	1.519	1.877	4.478	33.28	26.682	36.786	4.16307	3.05104e-09	1
NM_010185	chr1	Fcer1g|AI573376|CD23|FcR-gamma|FcR[g]|FcRgamma|Fce1g|FcepsilonRI|Ly-50|-|1 H3|1 79.23 cM|protein-coding	8.7535	157.73		18.723	5.28	3.887	7.124	160.069	148.729	167.466	154.657	4.12616	2.4399e-12	1
NM_174854	chr8	Disc1|-|-|8 E2|8 73.26 cM|protein-coding	0.06925	1.1895		0.077	0.044	0.064	0.092	0.828	1.12	1.454	1.356	4.11803	2.06651e-16	1
NM_013657	chr5	Sema3c|1110036B02Rik|SemE|Semae|-|5|5 A3|protein-coding	0.18375	3.16525		0.212	0.172	0.088	0.263	1.497	3.36	4.383	3.421	4.07945	2.10037e-15	0
NM_001034115	chr7	Shank1|-|-|7|7 B3|protein-coding	0.2355	3.8795		0.159	0.211	0.302	0.27	0.971	4.555	3.678	6.314	4.02672	2.96396e-11	0
NM_013681	chr6	Syn2|2900074L19Rik|AI836018|AI841723|-|6 E3|6 53.2 cM|protein-coding	0.8095	13.1683		0.457	0.544	1.605	0.632	5.716	9.802	24.172	12.983	4.02397	6.77332e-10	0
NM_001025383	chrX	Gm14685|-|-|X A7.3|X|protein-coding	0.1295	2.1615		0.265	0.077	0.156	0.02	2.305	1.986	2.689	1.666	4.00215	1.54313e-07	1
NM_001025384	chrX	DXBay18|-|-|X|X A7.3|protein-coding	0.12525	2.0915		0.257	0.074	0.151	0.019	2.221	1.924	2.606	1.615	3.99988	1.56297e-07	0
NM_170684	chr8	Cpne7|AW047065|-|8|8 E1|protein-coding	0.07675	1.282		0.231	0.03	0	0.046	0.709	1.305	1.332	1.782	3.94047	0.000751126	1
NM_008771	chr11	P2rx1|AI323649|BB122383|P2x|Pdcd3|RP-2|-|11 B4|11 45.09 cM|protein-coding	0.65925	9.985		0.443	0.642	0.699	0.853	7.794	8.793	12.732	10.621	3.92254	2.01625e-35	1
NM_001190374	chr7	Adamtsl3|9230119C12Rik|C130057K09|mKIAA1233|-|7|7 D3|protein-coding	0.09475	1.4225		0.094	0.107	0.094	0.084	1.62	0.91	2.366	0.794	3.91073	7.90871e-14	1
NM_019915	chr7	Art2b|ART2.2|ARTC2|Art|Ly92b|Rt-6|Rt6|Rt6-2|-|7 E2|7 54.61 cM|protein-coding	0.066	1.02775		0	0.041	0	0.223	0.125	1.199	1.212	1.575	3.86239	0.0164076	1
NM_009504	chr15	Vdr|Nr1i1|-|15|15 F1|protein-coding	0.3785	5.41625		0.332	0.637	0.227	0.318	1.776	3.981	10.468	5.44	3.83593	8.42088e-09	0
NM_009618	chr14	Adam2|AI323749|Ftnb|Ph30-beta|-|14 D1|14 34.36 cM|protein-coding	0.1965	2.80625		0.5	0.055	0.156	0.075	3.279	2.541	2.742	2.663	3.76215	6.16626e-06	1
NM_001205234	chr19	Nrxn2|6430591O13Rik|mKIAA0921|-|19 A|19|protein-coding	0.148	1.9865		0.13	0.107	0.172	0.183	1.189	1.333	3.319	2.105	3.73488	1.27827e-14	0
NM_023842	chr13	Dsp|2300002E22Rik|5730453H04Rik|AA407887|AA407888|AW109828|DP|rul|-|13|13 A3.3|protein-coding	0.13475	1.68725		0.047	0.244	0.081	0.167	0.279	2.164	1.543	2.763	3.64719	3.90261e-05	1
NM_001289916	chr9	Rora|9530021D13Rik|Nr1f1|ROR1|ROR2|ROR3|nmf267|sg|staggerer|tmgc26|-|9 C|9 37.45 cM|protein-coding	0.913	11.3942		0.5	0.751	1.552	0.849	1.855	7.958	23.659	12.105	3.64069	1.00331e-05	1
NM_207237	chr4	Man1c1|AI593348|-|4|4 D3|protein-coding	0.31075	3.82825		0.362	0.475	0.112	0.294	5.342	2.68	4.071	3.22	3.62819	6.40824e-12	1
NM_013748	chr5	Clnk|MIST|-|5|5 B3|protein-coding	1.16275	15.125		3.927	0.204	0.237	0.283	23.968	7.4	19.667	9.465	3.62736	0.0142633	1
NM_177056	chr1	Tmem198|A230078I05Rik|Tmem198-1|Tmem198a|-|1|1 C4|protein-coding	0.0945	1.19175		0.084	0.098	0.057	0.139	0.744	1.338	1.433	1.252	3.61987	1.7792e-12	0
NM_008007	chr7	Fgf3|Fgf-3|Int-2|Int-P|-|7 F5|7 88.85 cM|protein-coding	13.6155	172.04		32.649	6.467	3.737	11.609	154.705	167.541	194.332	171.58	3.60403	2.72613e-06	0
NM_172909	chr7	Cd163l1|B430307C05|E430002D04Rik|Scart1|-|7|7 F4|protein-coding	33.613	421.174		71.934	14.996	31.567	15.955	249.186	405.286	561.46	468.765	3.5921	9.49186e-08	1
NM_001310750	chr9	Pde4a|D9Ertd60e|Dpde2|-|9 A3|9 7.73 cM|protein-coding	0.8005	9.43875		0.786	0.915	0.77	0.731	9.158	9.248	9.687	9.662	3.55666	2.76687e-65	1
NM_031168	chr5	Il6|Il-6|-|5 B1|5 15.7 cM|protein-coding	0.11125	1.385		0.254	0.094	0	0.097	0.286	1.654	1.243	2.357	3.52264	0.00277561	1
NM_017401	chr11	Polm|AI462166|B230309I03Rik|Tdt-N|-|11|11 A1|protein-coding	1.83075	20.1953		1.539	1.618	2.649	1.517	17.967	15.923	27.754	19.137	3.46403	4.95574e-28	1
NR_136934	chr9	Gm15511|OTTMUSG00000023029|-|9 C|9 38.58 cM|ncRNA	0.21225	2.36		0.142	0.384	0.223	0.1	0.455	1.935	4.44	2.61	3.46146	0.00046167	1
NM_001281487	chr13	Cdc20b|EG238896|EG622422|-|13|13 D2.2|protein-coding	0.4875	5.32825		0.203	0.596	0.758	0.393	2.935	4.57	8.959	4.849	3.4614	4.18277e-09	1
NM_010229	chr5	Flt3|B230315G04|CD135|Flk-2|Flk2|Flt-3|Ly72|wmfl|-|5 86.88 cM|5 G3|protein-coding	0.12375	1.42875		0.289	0.02	0.102	0.084	1.33	1.236	1.834	1.315	3.45894	2.03043e-05	1
NM_016864	chr10	Atoh7|Math5|bHLHa13|-|10 B4|10 32.54 cM|protein-coding	0.19775	2.34525		0.468	0	0.138	0.185	4.665	1.197	2.545	0.974	3.45438	0.00247878	1
NM_009402	chr7	Pglyrp1|PGRP|PGRP-S|Pglyrp|Tag7|Tasg7|Tnfsf3l|-|7|7 A3|protein-coding	0.29675	3.09325		0.388	0.157	0.274	0.368	8.528	1.388	1.287	1.17	3.37077	0.00236684	1
NM_009565	chr3	Zbtb7b|Thpok|Zfp67|c-Krox|-|3 F1|3 39.09 cM|protein-coding	0.47575	4.7555		0.263	0.923	0.193	0.524	2.269	4.309	7.018	5.426	3.33215	2.10174e-07	0
NM_010019	chr9	Dapk2|-|-|9 C|9 35.75 cM|protein-coding	0.21525	2.1995		0.344	0.162	0.229	0.126	1.992	2.825	2.085	1.896	3.30638	1.423e-11	1
NM_020564	chr8	Sult5a1|Sult-x1|Sultx1|-|8|8 E1|protein-coding	0.11075	1.174		0.296	0.123	0	0.024	0.877	1.281	0.808	1.73	3.29619	0.00290489	1
NM_009915	chr9	Ccr2|Cc-ckr-2|Ccr2a|Ccr2b|Ckr2|Ckr2a|Ckr2b|Cmkbr2|mJe-r|-|9 F4|9 75.05 cM|protein-coding	6.69975	65.6025		11.665	3.312	7	4.822	69.169	35.185	109.772	48.284	3.26763	4.34901e-08	1
NM_033042	chr4	Tnfrsf25|APO-3|DDR3|DR3|LARD|TR3|TRAMP|Tnfrsf12|WSL-1|WSL-LR|Wsl|-|4|4 E2|protein-coding	0.1675	1.6335		0.213	0.177	0.039	0.241	1.192	1.631	2.434	1.277	3.25385	1.37256e-07	0
NM_013739	chr13	Dok3|AI450713|Dokl|-|13|13 B1|protein-coding	4.50525	42.8847		3.304	4.835	3.729	6.153	29.781	50.853	41.579	49.326	3.24873	1.28358e-31	1
NM_172659	chr2	Slc2a6|A330096C23|F630103L12Rik|Glut6|Glut9|-|2|2 A3|protein-coding	0.20425	2.01025		0.481	0.1	0.145	0.091	3.563	1.467	1.624	1.387	3.24426	0.00015952	1
NM_001271727	chr3	Trim2|mKIAA0517|narf|-|3|3 F1|protein-coding	0.184	1.725		0.104	0.31	0.1	0.222	0.626	1.316	3.493	1.465	3.20622	7.3402e-06	0
NM_010575	chr11	Itga2b|AI172977|CD41|CD41B|GpIIb|alphaIIb|-|11 D|11 66.29 cM|protein-coding	3.005	28.43		5.997	1.852	0.952	3.219	32.794	28.514	25.207	27.205	3.20551	2.84991e-07	1
NM_011851	chr9	Nt5e|2210401F01Rik|5'-NT|AI447961|CD73|NT|Nt5|eNT|-|9|9 E3.1|protein-coding	0.39	3.77025		0.977	0.169	0.19	0.224	2.463	3.642	5.422	3.554	3.20341	6.8841e-05	1
NM_009936	chr2	Col9a3|AV006866|-|2 H4|2 103.14 cM|protein-coding	1.993	18.1698		1.091	1.802	2.546	2.533	11.673	16.179	27.696	17.131	3.19612	7.48787e-16	0
NM_011382	chr12	Six4|AI047561|AREC3|TrexBF|-|12|12 C3|protein-coding	0.12925	1.13925		0.085	0.255	0.078	0.099	0.822	0.734	2.08	0.921	3.16067	1.52905e-06	0
NM_175937	chr5	Cpeb2|A630055H10Rik|Cpe-bp2|-|5|5 B3|protein-coding	0.16825	1.5265		0.132	0.163	0.169	0.209	0.556	1.773	1.548	2.229	3.15858	5.15418e-10	1
NM_181754	chr13	Gpr141|PGR13|-|13|13 A2|protein-coding	0.6875	6.2335		1.209	0.403	0.405	0.733	8.424	5.838	5.648	5.024	3.15208	6.03648e-10	1
NM_172884	chr5	2900026A02Rik|8430408O14Rik|A530094D01|AW539426|Gm449|Kiaa1671|mKIAA1671|-|5|5 F|protein-coding	7.3605	62.9518		3.904	7.971	6.677	10.89	29.312	65.01	82.387	75.098	3.10093	4.37103e-13	1
NM_033217	chr11	Ngfr|LNGFR|Tnfrsf16|p75|p75NGFR|p75NTR|-|11 D|11 59.01 cM|protein-coding	0.1385	1.19175		0.108	0.052	0.191	0.203	1.582	0.632	1.556	0.997	3.09771	9.51143e-07	0
NM_031174	chr16	Dscam|4932410A21Rik|-|16 C4|16 57.02 cM|protein-coding	0.13675	1.1495		0.046	0.19	0.07	0.241	0.673	1.062	1.467	1.396	3.08418	1.71768e-06	1
NM_028460	chr3	Pear1|3110045G13Rik|Jedi-1|Megf12|-|3|3 F1|protein-coding	0.989	8.42125		0.5	1.144	0.894	1.418	6.003	7.334	10.533	9.815	3.08032	6.48459e-17	1
NM_031379	chrX	Tktl1|C79967|-|X|X A7.3|protein-coding	0.14825	1.258		0.085	0.188	0.151	0.169	0.337	1.528	1.49	1.677	3.0753	7.01458e-06	0
NM_020518	chr9	Vsig2|1190004B15Rik|2210413P10Rik|AU040484|CTX|Ctm|-|9|9 A4|protein-coding	0.19625	1.7215		0.248	0.122	0.106	0.309	1.521	1.818	1.55	1.997	3.07074	8.82913e-10	0
NM_183031	chr14	Gpr183|Ebi2|-|14|14 E5|protein-coding	1.31875	11.1752		1.436	1.013	1.313	1.513	6.843	10.742	15.102	12.014	3.06638	1.04386e-20	1
NM_010654	chr6	Klrd1|CD94|-|6 F3|6 63.42 cM|protein-coding	0.639	5.376		0.428	0.661	0.791	0.676	1.764	5.584	8.497	5.659	3.06292	6.7998e-07	1
NM_018784	chr16	St3gal6|1700023B24Rik|AI930218|AW552396|Siat10|St3galVI|-|16|16 C1.2|protein-coding	0.29925	2.46675		0.232	0.337	0.313	0.315	0.867	2.27	3.724	3.006	3.03161	3.7027e-07	1
NM_021416	chr5	Fam184b|9630031F12Rik|AB041544|-|5|5 B3|protein-coding	0.13075	1.097		0.294	0.043	0.105	0.081	2.177	0.433	1.06	0.718	3.02992	0.00205078	0
NM_022018	chr1	Fam129a|AI256368|AU019833|Niban|-|1|1 G1|protein-coding	2.875	23.5397		3.655	2.61	2.336	2.899	13.979	16.183	40.064	23.933	3.01725	3.11113e-13	0
NM_010496	chr12	Id2|AI255428|C78922|Idb2|bHLHb26|-|12 A1.3|12 8.57 cM|protein-coding	11.5705	92.4735		11.958	12.054	11.398	10.872	40.725	78.798	146.923	103.448	2.98541	3.94613e-14	1
NM_007720	chr9	Ccr8|C-C|C-C CKR-8|CC-CKR-8|CCR-8|CKR-8|Cmkbr8|mCCR8|-|9|9 F4|protein-coding	0.13725	1.13175		0.387	0.031	0.107	0.024	0.97	0.465	2.24	0.852	2.94161	0.0274452	1
NR_033635	chr6	9130019P16Rik|6430501H15Rik|OTTMUSG00000023151|-|6 B3|6|ncRNA	0.135	1.02575		0.111	0.151	0.173	0.105	0.516	0.824	1.677	1.086	2.92081	7.97108e-08	0
NM_008365	chr1	Il18r1|Il18ralpha|Il1rrp|-|1|1 B|protein-coding	0.34	2.697		0.987	0.145	0.141	0.087	1.191	1.439	5.848	2.31	2.90874	0.0233762	1
NM_013867	chr3	Bcar3|AI131758|AND-34|-|3|3 G1|protein-coding	0.4015	3.03025		0.383	0.453	0.535	0.235	1.48	2.233	5.195	3.213	2.90637	1.28422e-07	1
NM_174990	chr6	Gimap4|AU019574|E430007K16Rik|Ian-1|Ian1|Imap4|-|6|6 B2.3|protein-coding	2.729	20.4225		2.875	2.65	3.556	1.835	9.462	20.955	26.942	24.331	2.88478	4.15899e-12	1
NM_008510	chr1	Xcl1|AI661682|ATAC|LTN|Lptn|SCM-1|SCM-1a|Scyc1|-|1 H2.2|1 72.26 cM|protein-coding	0.79725	5.762		0.105	1.212	1.428	0.444	4.132	5.932	8.209	4.775	2.87621	0.000540199	1
NM_013905	chr4	Heyl|Hey3|Hrt3|bHLHb33|hesr3|-|4|4 D2.2|protein-coding	0.8135	5.866		0.139	0.924	0.989	1.202	0.653	7.885	6.511	8.415	2.85377	0.00751672	1
NM_028679	chr10	Irak3|4833428C18Rik|AI563835|IRAK-M|-|10|10 D2|protein-coding	2.25525	16.4465		3.184	1.331	2.778	1.728	14.218	13.843	20.325	17.4	2.84264	7.95124e-14	1
NM_133977	chr9	Trf|AI266983|Cd176|HP|Tf|Tfn|hpx|-|9 F1|9 55.03 cM|protein-coding	13.5245	95.0447		16.568	9.897	14.648	12.985	108.252	74.653	111.726	85.548	2.80538	2.69833e-24	0
NM_145222	chr1	B3gnt7|C330001H22Rik|beta-3GnT7|-|1|1 C5|protein-coding	0.16025	1.14125		0.152	0.109	0.071	0.309	0.487	0.853	1.783	1.442	2.80474	0.000167297	1
NM_028306	chr2	Hspa12b|2700081N06Rik|-|2|2 F1|protein-coding	0.17925	1.2695		0.269	0.085	0.137	0.226	1.711	1.133	1.014	1.22	2.78732	1.93014e-07	0
NM_145611	chr9	Kank2|AI504612|Ankrd25|BC010245|-|9|9 A3|protein-coding	1.342	9.05175		0.628	2.556	0.689	1.495	4.892	9.721	12.096	9.498	2.7669	1.09587e-06	1
NM_031867	chr4	Tas1r1|Gpr70|T1r1|TR1|-|4 E2|4 82.83 cM|protein-coding	4.2685	29.481		8.136	2.399	3.378	3.161	28.143	28.194	31.156	30.431	2.7486	5.053e-09	0
NM_172296	chr4	Dmrta2|Dmrt5|-|4|4 C7|protein-coding	0.23775	1.59175		0.125	0.301	0.262	0.263	0.551	1.663	1.835	2.318	2.74151	6.62303e-06	0
NM_001163189	chr15	Enthd1|Gm1242|Gm86|-|15|15 E1|protein-coding	0.2265	1.48875		0.162	0.152	0.382	0.21	0.771	0.94	3.011	1.233	2.70963	0.000204778	1
NM_001243757	chr7	Pde2a|CGS-PDE|cGSPDE|-|7|7 E2|protein-coding	2.7495	17.8987		2.705	2.547	2.341	3.405	14.696	16.805	19.085	21.009	2.69021	2.43603e-36	1
NM_172507	chr9	Sh3bgrl2|A930014C21Rik|AA408038|B930089I21|-|9|9 E2|protein-coding	0.16875	1.105		0.248	0.183	0.141	0.103	1.217	1.016	1.125	1.062	2.68813	2.53691e-09	1
NM_001039000	chr10	Kif5a|D10Bwg0738e|Khc|Kif5|Kns|mKIAA4086|-|10 D3|10 74.5 cM|protein-coding	1.002	6.55925		1.39	0.643	1.135	0.84	3.701	6.22	9.253	7.063	2.68226	1.38532e-10	0
NM_019563	chr4	Cited4|MRG-2|Mrg2|-|4 D2.2|4 56.52 cM|protein-coding	6.164	39.129		2.297	6.494	7.77	8.095	17.14	40.577	50.199	48.6	2.67359	2.49849e-07	0
NM_028341	chr18	Ttc39c|1700008N02Rik|2810439F02Rik|-|18|18 A1|protein-coding	0.3	1.943		0.409	0.344	0.039	0.408	1.065	1.725	2.875	2.107	2.6681	0.000968424	0
NM_028872	chr1	5730559C18Rik|1700034M08Rik|4933426C09Rik|AI586180|D1Mgi54|-|1 E4|1|protein-coding	1.42	9.03175		1.424	1.051	1.522	1.683	5.871	7.826	12.386	10.044	2.65747	2.12814e-15	1
NM_152220	chr19	Stx3|Syn-3|-|19|19 A|protein-coding	0.59025	3.69575		0.451	0.533	0.606	0.771	3.705	3.178	4.392	3.508	2.64932	1.56213e-17	1
NM_175272	chr7	Nav2|5330421F07Rik|AU067780|BQ960892|HELAD1|POMFIL2|RAINB1|RAINB2|Unc53H2|mKIAA3015|-|7|7 B4|protein-coding	0.1695	1.06025		0.148	0.177	0.112	0.241	0.69	0.663	1.917	0.971	2.63172	3.98796e-07	1
NM_007551	chr9	Cxcr5|Blr1|CXC-R5|CXCR-5|Gpcr6|MDR15|-|9 A5.2|9 24.84 cM|protein-coding	10.4223	66.4008		22.929	3.04	12.421	3.299	69.332	50.183	89.851	56.237	2.62475	0.0023182	1
NM_001256082	chr7	Myo7a|Hdb|Myo7|USH1B|nmf371|polka|sh-1|sh1|-|7 E1|7 53.57 cM|protein-coding	0.29475	1.8105		0.373	0.223	0.267	0.316	2.49	1.342	1.906	1.504	2.61041	2.07954e-11	1
NM_001161665	chr1	Kif26b|4832420M10|BC056349|D230039L06Rik|-|1 H4|1 83.16 cM|protein-coding	0.22	1.32575		0.078	0.408	0.084	0.31	0.117	1.451	1.527	2.208	2.5957	0.0322942	0
NM_009924	chr4	Cnr2|CB-2|CB2|CB2-R|-|4|4 D3|protein-coding	0.59075	3.57325		0.846	0.509	0.435	0.573	3.777	3.374	4.136	3.006	2.5887	7.76076e-13	1
NM_001201470	chr19	Papss2|1810018P12Rik|AI159688|AtpsU2|Atpsk2|Sk2|bm|-|19 C1|19 27.46 cM|protein-coding	0.7965	4.734		0.79	0.83	0.973	0.593	9.699	2.392	4.41	2.435	2.56396	4.1603e-05	1
NM_001277149	chr4	Chd7|A730019I05Rik|Cycn|Cyn|Dz|Edy|Flo|GENA 47|GENA 60|Gena 52|Lda|Mt|Obt|Todo|WBE1|Whi|metis|-|4 A1|4 3.68 cM|protein-coding	0.4565	2.6975		0.526	0.337	0.556	0.407	3.381	1.835	3.409	2.165	2.56047	3.68657e-12	1
NM_001160378	chr9	Fam46a|BAP014|D930050G01Rik|-|9|9 E3.1|protein-coding	0.25875	1.50925		0.116	0.488	0.142	0.289	0.576	1.594	2.309	1.558	2.54686	0.000320466	1
NR_045795	chr17	Gm16702|AU016609|-|17 A1|17 4.92 cM|ncRNA	0.32575	1.877		0.11	0.342	0.48	0.371	0.969	1.52	2.911	2.108	2.53712	7.84428e-05	1
NM_013653	chr11	Ccl5|MuRantes|RANTES|SISd|Scya5|TCP228|-|11 C|11 50.66 cM|protein-coding	0.6395	3.78925		1.246	0.337	0.293	0.682	5.343	1.911	5.932	1.971	2.52226	0.0052027	1
NM_001081072	chr18	Slc27a6|4732438L20Rik|FACVL2|FATP6|VLCS-H1|-|18|18 D3|protein-coding	0.38625	2.202		0.223	0.589	0.274	0.459	0.557	2.241	2.413	3.597	2.50769	0.000604286	0
NM_027147	chr4	Enho|1110065P19Rik|2310040A07Rik|-|4|4 A5|protein-coding	0.20525	1.1655		0.253	0.314	0.099	0.155	1.913	0.862	0.965	0.922	2.49708	0.000156942	1
NM_001033167	chr13	Slc22a23|3110004L20Rik|-|13|13 A3.3|protein-coding	0.2945	1.6275		0.286	0.295	0.247	0.35	1.617	1.386	1.837	1.67	2.46221	2.26519e-16	1
NM_175485	chr9	Prtg|A230098A12Rik|Igdcc5|-|9|9 D|protein-coding	0.26625	1.4855		0.279	0.182	0.427	0.177	0.8	1.38	2.255	1.507	2.46154	1.40633e-06	1
NM_007754	chr11	Cpd|AA960140|AW322530|D830034L15Rik|-|11 B5|11 46.05 cM|protein-coding	0.98675	5.49825		1.502	1.227	0.389	0.829	5.451	4.771	6.3	5.471	2.46007	1.54846e-07	0
NM_007653	chr10	Cd63|C75951|ME491|Tspan30|-|10 D3|10 77.19 cM|protein-coding	22.424	122.229		14.418	47.313	5.762	22.203	92.006	125.795	149.393	121.721	2.45855	0.000203474	1
NM_172448	chr11	Rnf43|4732452J19Rik|-|11|11 C|protein-coding	0.3075	1.719		0.421	0.14	0.438	0.231	1.182	1.2	2.736	1.758	2.45532	3.62913e-05	1
NM_010370	chr13	Gzma|AW494114|Ctla-3|Ctla3|Hf|Hf1|SE1|TSP-1|TSP1|-|13 D2.2|13 63.93 cM|protein-coding	356.594	1955.07		619.398	225.709	378.58	202.688	1918.73	1962.27	2227.45	1711.85	2.42237	9.71367e-08	1
NM_178653	chr1	Sccpdh|AW214504|C330023F11Rik|-|1|1 H4|protein-coding	0.96275	5.221		1.511	1.133	0.194	1.013	4.872	5.127	5.896	4.989	2.41497	0.000263001	1
NM_001163640	chr6	Chn2|1700026N20Rik|4930557O16Rik|ARHGAP3|Bch|-|6|6 B3|protein-coding	2.567	13.615		2.257	2.566	1.782	3.663	8.39	13.198	18.498	14.374	2.40275	4.78273e-12	1
NM_138653	chr4	Bspry|-|-|4|4 B3|protein-coding	0.2075	1.1295		0.348	0.061	0.214	0.207	1.621	0.754	1.073	1.07	2.39877	0.000464595	1
NM_053273	chr11	Ttyh2|1110001A03Rik|-|11|11 E2|protein-coding	1.02125	5.2965		0.914	1.7	0.323	1.148	5.07	4.149	6.488	5.479	2.38249	9.38553e-06	0
NM_017373	chr13	Nfil3|AV225605|E4BP4|-|13 B1|13 27.68 cM|protein-coding	2.68525	14.3005		5.129	2.139	1.459	2.014	16.131	11.83	15.89	13.351	2.38011	4.32603e-06	1
NM_010358	chr3	Gstm1|Gstb-1|Gstb1|-|3|3 F2.3|protein-coding	5.098	26.2508		2.001	7.644	3.845	6.902	8.503	22.178	42.944	31.378	2.37626	0.000500412	1
NM_009917	chr9	Ccr5|AM4-7|CD195|Cmkbr5|-|9 F4|9 75.05 cM|protein-coding	1.40875	7.1635		1.776	1.031	1.383	1.445	9.002	3.91	10.832	4.91	2.34289	9.51143e-07	1
NM_022409	chr7	Zfp296|2210018A16Rik|Znf296|-|7|7 A3|protein-coding	1.0535	5.339		1.238	1.208	0.971	0.797	4.111	5.712	5.666	5.867	2.32618	7.38843e-12	0
NM_001114124	chr2	Dab2ip|2310011D08Rik|AI480459|Aip1|mKIAA1743|-|2|2 B|protein-coding	0.7985	3.98075		0.465	1.268	0.322	1.139	2.555	4.384	3.747	5.237	2.32094	1.46756e-05	1
NM_001122998	chr17	Tiam2|3000002F19Rik|STEF|mKIAA2016|-|17 A1|17 1.99 cM|protein-coding	0.9395	5.1345		0.765	1.356	0.548	1.089	4.25	4.85	6.402	5.036	2.31547	4.65288e-09	1
NM_178045	chr6	Rassf4|3830411C14Rik|AD037|AI586137|-|6|6 E3|protein-coding	0.8575	4.27675		1.503	0.554	0.902	0.471	4.889	3.08	5.222	3.916	2.29035	9.98867e-06	1
NM_009368	chr12	Tgfb3|TGF-beta-3|Tgfb-3|-|12 D2|12 40.09 cM|protein-coding	1.63025	7.80025		0.489	3.422	0.795	1.815	4.525	6.381	12.272	8.023	2.2829	0.00275533	1
NM_001035122	chr13	Golm1|2310001L02Rik|AW125446|D030064E01Rik|GP73|Golph2|PSEC0257|-|13|13 B2|protein-coding	3.483	17.2192		6.085	2.979	1.776	3.092	18.987	15.716	17.992	16.182	2.27852	3.57044e-07	1
NM_020047	chr6	Tacstd2|C80403|EGP-1|GA733-1|Ly97|TROP2|-|6|6 C1|protein-coding	0.45825	2.25625		0.64	0.322	0.683	0.188	2.578	1.693	2.709	2.045	2.27737	0.000165371	1
NM_001347159	chr4	Acot11|1110020M10Rik|2010309H15Rik|AW060409|BFIT|BFIT1|Thea|Them1|mKIAA0707|-|4|4 C7|protein-coding	0.71075	3.539		1.747	0.297	0.391	0.408	5.106	2.514	3.604	2.932	2.26879	0.00756916	1
NM_175367	chr12	Ston2|4933401N24Rik|AI425999|AW544599|-|12|12 D3|protein-coding	1.59875	7.7515		1.98	1.111	1.894	1.41	5.693	5.198	11.973	8.142	2.2622	5.12377e-09	1
NM_021424	chr9	Nectin1|AI835281|AW549174|Cd111|HIgR|HveC|PRR|PRR1|Pvrl1|nectin-1|-|9|9 A5.1|protein-coding	0.3485	1.6755		0.405	0.323	0.366	0.3	2.075	1.154	2.042	1.431	2.26044	7.39561e-09	0
NM_010359	chr3	Gstm3|Fsc2|mGSTM5|-|3|3 F2.3|protein-coding	0.7435	3.51075		0.242	1.13	0.699	0.903	0.907	3.485	5.99	3.661	2.25041	0.00878485	0
NM_172750	chr8	Adprhl1|Arh2|D330008N11Rik|-|8|8 A1.1|protein-coding	1.01025	4.7725		1.45	0.444	1.638	0.509	6.51	2.817	6.283	3.48	2.2237	0.00256168	1
NM_033569	chr19	Cnnm2|AU015877|AW048635|Acdp2|Clp2|-|19 C3|19 38.97 cM|protein-coding	2.3375	10.8567		1.772	2.145	2.711	2.722	6.42	9.325	15.899	11.783	2.2135	1.48977e-10	1
NR_104381	chr4	Plekhg5|BC023181|Syx|-|4|4 E2|protein-coding	3.2765	15.1512		2.807	3.749	3.622	2.928	13.028	14.362	17.487	15.728	2.20951	4.95574e-28	1
NM_001039644	chr1	Edem3|2310050N11Rik|-|1|1 G1-G2|protein-coding	7.4695	34.258		7.363	7.623	7.07	7.822	22.85	25.552	59.504	29.126	2.19394	6.34885e-10	1
NM_010723	chr3	Lmo4|A730077C12Rik|Crp3|Etohi4|-|3 H2|3 68.61 cM|protein-coding	20.8483	96.0053		18.242	24.556	17.511	23.084	27.518	91.13	153.289	112.084	2.19314	2.67621e-05	1
NM_153143	chr11	Kctd11|AF465352|Ren|-|11|11 B3|protein-coding	1.37975	6.304		1.369	1.772	0.987	1.391	4.188	6.728	7.679	6.621	2.18404	1.83118e-11	1
NM_030712	chr9	Cxcr6|BB217514|BONZO|STRL33|-|9 F4|9 74.57 cM|protein-coding	0.39375	1.8005		0.319	0.263	0.555	0.438	0.324	1.259	4.002	1.617	2.17961	0.0299212	1
NM_146149	chr4	Fam151a|2010309H15Rik|-|4|4 C7|protein-coding	0.48575	2.27725		1.209	0.169	0.229	0.336	3.437	1.58	2.242	1.85	2.17556	0.0276037	0
NM_001177846	chr9	Tirap|AA407980|C130027E04Rik|Mal|Tlr4ap|Wyatt|-|9|9 A4|protein-coding	0.31575	1.39125		0.371	0.41	0.192	0.29	1.644	1.213	1.317	1.391	2.16087	1.73127e-07	1
NM_033612	chr15	Cela1|1810009A17Rik|1810062B19Rik|Ela-1|Ela1|PC-TsF|-|15 F1|15 56.38 cM|protein-coding	1.192	5.395		1.794	1.584	0.282	1.108	4.208	5.411	5.639	6.322	2.15233	0.00116024	1
NM_001025577	chr8	Maf|2810401A20Rik|A230108G15Rik|AW047063|c-maf|-|8 E1|8 62.61 cM|protein-coding	6.7055	29.2398		1.577	10.03	6.241	8.974	14.843	23.477	49.967	28.672	2.147	0.00229496	1
NM_175362	chr5	Card11|0610008L17Rik|2410011D02Rik|BIMP3|CARMA1|-|5|5 G2|protein-coding	4.91925	21.7188		4.363	4.372	6.043	4.899	9.685	18.223	36.624	22.343	2.13435	5.84914e-07	1
NM_028275	chr14	1700112E06Rik|2700009F18Rik|-|14|14 A3|protein-coding	1.1245	4.968		1.424	1.021	1.471	0.582	4.075	4.494	7.251	4.052	2.12457	5.00462e-05	1
NM_011594	chr11	Timp2|D11Bwg1104e|Timp-2|-|11 E2|11 83.09 cM|protein-coding	22.7725	98.9015		13.284	38.081	12.104	27.621	48.083	123.251	96.698	127.574	2.12073	3.41544e-05	1
NM_020286	chr7	Tspan32|AW208513|Art-1|BB235973|D7Wsu37e|Phemx|Tssc6|-|7 F5|7 88.09 cM|protein-coding	5.45625	23.7272		6.343	5.401	3.843	6.238	18.743	26.349	26.406	23.411	2.10629	1.98859e-15	1
NM_080595	chr11	Emid1|AW122071|CO-5|Emu1|-|11|11 A1|protein-coding	13.4942	57.7675		8.977	12.884	18.612	13.504	48.487	56.079	66.364	60.14	2.10231	6.61375e-18	1
NM_207687	chr4	Espn|je|-|4 E2|4 82.9 cM|protein-coding	1.132	5.58675		1.174	1.08	1.161	1.113	9.137	3.332	5.43	4.448	2.07097	2.76441e-08	1
NM_018767	chr3	Cd160|AU045688|By55|-|3|3 F2.1|protein-coding	6.08275	25.842		6.736	5.218	6.12	6.257	15.097	27.446	33.352	27.473	2.07018	7.73498e-13	1
NM_201352	chr7	Gdpd5|BC024955|Gde2|-|7|7 E1|protein-coding	0.25875	1.077		0.169	0.428	0.113	0.325	0.738	1.044	1.339	1.187	2.06675	0.000361089	1
NM_017480	chr1	Icos|AILIM|CCLP|CRP-1|H4|Ly115|-|1 C2|1 30.6 cM|protein-coding	1.828	7.60625		1.3	1.692	2.509	1.811	4.372	4.612	14.367	7.074	2.06123	7.99875e-05	1
NM_001038499	chr18	Arsi|BC020108|-|18|18 E1|protein-coding	2.09125	8.59325		1.906	2.185	2.154	2.12	13.855	5.671	7.627	7.22	2.05247	3.68749e-07	1
NM_001081144	chr5	Zfp518b|6820424L24Rik|AA410078|AI661722|Znf518b|-|5|5 B3|protein-coding	1.2745	5.34075		1.82	1.165	0.97	1.143	5.978	4.25	6.105	5.03	2.05207	5.14894e-10	1
NM_001001565	chr1	Chpf|1700028N03Rik|AI414328|D1Bwg1363e|-|1 C4|1 39.14 cM|protein-coding	2.6645	10.916		1.384	5.041	1.37	2.863	8.92	11.54	10.732	12.472	2.05155	4.69558e-05	1
NM_008479	chr6	Lag3|CD223|LAG-3|Ly66|-|6|6 F2|protein-coding	5.5775	22.5512		1.526	6.596	6.611	7.577	19.978	20.777	25.635	23.815	2.03821	5.42115e-05	1
NM_009985	chr19	Ctsw|lymphopain|-|19|19 A|protein-coding	6.303	26.222		8.676	5.467	5.648	5.421	19.608	25.656	33.724	25.9	2.03428	8.67575e-11	1
NM_028940	chr4	Clvs1|4933402J24Rik|Clvl1|Rlbp1l1|-|4|4 A1|protein-coding	0.6405	2.62375		0.678	0.778	0.438	0.668	2.164	2.674	2.903	2.754	2.02651	4.2309e-10	1
NM_001126047	chr1	Sema4c|AI426163|M-Sema F|Semacl1|Semaf|Semai|sema I|-|1|1 B|protein-coding	2.3995	9.50775		1.88	2.58	2.953	2.185	8.794	8.833	10.797	9.607	2.01818	4.14101e-19	1
NM_001033534	chr9	Layn|E030012M19Rik|Gm511|-|9|9 A5.3|protein-coding	0.65025	2.6885		1.122	0.579	0.434	0.466	2.942	2.754	2.601	2.457	2.01343	7.97381e-05	1
NM_027920	chr6	March8|1300017E09Rik|MARCH-VIII|Mir|-|6|6 E3|protein-coding	2.15375	8.70325		2.648	2.089	1.624	2.254	6.436	8.841	10.306	9.23	2.01107	2.19037e-13	1
NM_001039371	chr3	Slc22a15|2610034P21Rik|4930477M19|A530052I06Rik|BB219042|-|3|3 F2.2|protein-coding	0.3	1.228		0.431	0.209	0.335	0.225	1.001	0.9	1.92	1.091	2.00968	5.65778e-05	1
NM_001081275	chr1	Cfap126|1700009P17Rik|AV282292|Flattop|Fltp|-|1|1 H3|protein-coding	0.3635	1.46025		0.23	0.38	0.602	0.242	0.843	1.502	1.901	1.595	2.00683	0.00076394	1
NM_018729	chr1	Cd244|2B4|C9.1|F730046O15Rik|Ly90|NAIL|NKR2B4|Nmrk|SLAMF4|-|1 H3|1 79.52 cM|protein-coding	4.5145	17.96		5.519	4.019	3.105	5.415	17.463	17.793	18.807	17.777	1.98038	1.87632e-14	0
NM_001272031	chr16	Arvcf|-|-|16 A3|16 11.37 cM|protein-coding	7.5305	29.436		3.714	8.938	7.675	9.795	15.501	32.302	34.237	35.704	1.97236	4.22575e-07	1
NM_022029	chr9	Nrgn|0710001B06Rik|AI838505|NG|NG/RC3|Pss1|R75334|RC3|-|9 A4|9 20.78 cM|protein-coding	36.6167	145.025		48.595	32.874	20.404	44.594	146.929	148.328	129.022	155.823	1.97094	1.07032e-09	1
NM_007689	chr11	Chad|SLRR4A|-|11 D|11 58.9 cM|protein-coding	0.5835	2.2465		0.366	0.409	0.956	0.603	1.313	1.546	4.736	1.391	1.94831	0.0140202	1
NM_007996	chr9	Fdx1|-|-|9|9 A5.3|protein-coding	3.9555	15.4625		5.76	3.967	3.096	2.999	15.028	13.057	19.154	14.611	1.94792	8.98768e-08	1
NM_025556	chr8	Coprs|1700029I03Rik|2410022L05Rik|AA409325|AI256813|C85432|Copr5|-|8|8 A1.1|protein-coding	0.81075	3.163		1.054	1.157	0.581	0.451	2.716	3.83	3.844	2.262	1.94702	0.000538126	0
NM_178666	chr10	Themis|E430004N04Rik|Gasp|Spot|Tsepa|thylex|-|10|10 A4|protein-coding	2.9605	11.4638		1.988	1.954	6.187	1.713	3.683	10.426	20.829	10.917	1.94532	0.0156413	1
NM_027884	chr1	Tns1|1110018I21Rik|1200014E20Rik|AI648117|E030018G17Rik|E030037J05Rik|Tns|-|1 C3|1 38.17 cM|protein-coding	1.6025	6.15075		2.103	1.91	0.663	1.734	7.159	5.132	6.298	6.014	1.93266	5.21141e-06	0
NM_001033243	chr7	Ccdc114|-|-|7|7 B3|protein-coding	0.3665	1.409		0.376	0.392	0.506	0.192	0.783	1.209	2.301	1.343	1.92988	0.00155066	1
NM_145220	chr10	Appl2|Dip3b|-|10|10 C1|protein-coding	4.108	15.8555		5.436	4.269	2.957	3.77	11.123	16.052	20.134	16.113	1.92845	1.03314e-09	1
NM_001013783	chr11	Fam71b|Gari-l3|OTTMUSG00000005491|-|11 B1.1|11|protein-coding	1.069	4.0545		0.36	1.281	1.764	0.871	1.566	4.843	5.242	4.567	1.92835	0.00679884	1
NR_002854	chr2	Dlx1as|Dix1as|Dlx1os|-|2 C2|2 42.58 cM|ncRNA	0.3225	1.22975		0.301	0.368	0.265	0.356	0.93	1.344	1.365	1.28	1.92317	2.96595e-07	0
NM_001039194	chr10	Aifm2|5430437E11Rik|Amid|D730001I10Rik|PRG3|-|10|10 B4|protein-coding	0.48525	1.079		0.443	0.743	0.251	0.504	1.146	1.065	1.238	0.867	1.91044	0.00193101	0
NM_001013384	chr8	Podnl1|5832418A03Rik|Gm506|-|8|8 C2|protein-coding	6.22725	23.233		5.45	4.524	9.475	5.46	15.664	18.29	35.948	23.03	1.89455	2.89704e-06	1
NM_023066	chr4	Asph|2310005F16Rik|3110001L23Rik|AI848629|AW261690|AW561901|BAH|C79816|cI-37|-|4|4 A1|protein-coding	2.54975	9.13175		3.148	2.911	1.536	2.604	8.315	10.32	7.79	10.102	1.89275	3.71128e-14	1
NM_010101	chr13	S1pr3|AI132464|Edg3|Lpb3|S1p3|-|13|13 A5|protein-coding	2.84425	10.5802		3.47	3.986	1.136	2.785	12.531	9.707	10.359	9.724	1.89177	2.15732e-05	1
NM_008798	chr1	Pdcd1|Ly101|PD-1|Pdc1|-|1|1 D|protein-coding	4.83875	18.3918		9.46	3.151	3.514	3.23	14.559	15.941	24.712	18.355	1.88465	0.000680829	1
NM_145977	chr1	Slc45a3|2210413P12Rik|AU023994|AU043764|IPCA-6|PRST|Pcanap6|-|1|1 E4|protein-coding	4.225	15.5557		2.123	4.717	5.462	4.598	7.947	18.303	18.368	17.605	1.88263	4.61459e-06	1
NM_001080931	chr11	Med13|1110067M05Rik|D030023K18|Thrap1|Trap240|-|11|11 C|protein-coding	14.5192	53.3847		10.477	13.751	18.912	14.937	33.041	43.993	84.187	52.318	1.8801	1.02411e-07	1
NM_001252638	chr10	Rhobtb1|1700008H16Rik|3110048G13Rik|AI173445|AI573858|AV350930|-|10|10 B5.3|protein-coding	0.47825	1.80225		0.7	0.715	0.158	0.34	1.831	1.78	1.984	1.614	1.87662	0.00278028	1
NM_001033321	chr8	Tmem231|4932417I16Rik|Gm178|-|8|8 E1|protein-coding	0.68075	2.4775		0.51	0.714	0.847	0.652	1.916	2.282	3.409	2.303	1.86606	4.3444e-07	0
NM_009854	chr11	Cd7|-|-|11 E2|11 84.85 cM|protein-coding	16.1245	60.0328		30.268	9.424	14.474	10.332	55.059	49.606	86.345	49.121	1.86111	0.000728968	1
NM_146202	chr7	Zfp768|BC026432|Znf768|-|7|7 F3|protein-coding	2.73875	9.864		2.466	3.349	2.174	2.966	7.582	9.694	11.369	10.811	1.84664	3.59373e-12	1
NM_028787	chr1	Slc35f5|1300003P13Rik|AI646727|-|1|1 E2.3|protein-coding	0.9655	3.4655		1.199	1.429	0.538	0.696	3.185	3.352	3.792	3.533	1.83345	3.67787e-05	1
NM_010023	chr17	Eci1|Dci|eci|-|17|17 A3.3|protein-coding	4.68825	16.7432		5.063	4.519	4.221	4.95	14.586	17.34	16.996	18.051	1.82543	1.34446e-14	0
NM_018870	chr11	Pgam2|-|-|11|11 A1|protein-coding	3.758	13.1305		2.182	3.304	5.685	3.861	12.997	11.862	16.249	11.414	1.81554	3.42956e-06	1
NM_001085500	chr11	Cisd3|Mel-13|Mel13|-|11|11 D|protein-coding	5.14025	18.4485		8.785	4.039	4.815	2.922	20.681	16.638	20.19	16.285	1.81493	0.000208158	1
NM_175430	chr11	Ccdc40|B930008I02Rik|-|11|11 E2|protein-coding	0.573	2.025		0.708	0.493	0.629	0.462	1.846	1.98	2.227	2.047	1.80397	1.60162e-08	1
NM_011444	chr6	Sox5|A730017D01Rik|AI528773|-|6 G3|6 76.14 cM|protein-coding	0.69325	2.40225		0.609	0.592	0.865	0.707	1.964	1.613	4.116	1.916	1.79861	3.30734e-05	1
NM_001199227	chr7	Osbpl5|1110006M06Rik|AI462538|ORP5|Obph1|Osbp2|-|7 F5|7 88.29 cM|protein-coding	5.2455	18.397		6.264	4.671	5.148	4.899	15.359	17.276	21.446	19.507	1.79616	4.355e-16	0
NM_172832	chr18	Pcyox1l|BC060677|C630049M13|-|18|18 E1|protein-coding	5.7825	20.2578		8.598	5.186	4.715	4.631	21.164	19.228	21.264	19.375	1.78807	2.31861e-08	1
NR_106012	chr6	Mir7045|Gm27758|mmu-mir-7045|-|6|6 F2|ncRNA	1.5775	5.56825		1.268	1.715	1.991	1.336	2.906	8.105	7.742	3.52	1.78481	0.0483531	1
NM_206941	chr2	Ltk|-|-|2 E5|2 59.97 cM|protein-coding	1.05925	3.61525		0.945	0.543	1.753	0.996	1.982	3.837	4.977	3.665	1.78294	0.00128341	1
NM_001081416	chr17	Fndc1|1110027O12Rik|1110051A18Rik|mKIAA1866|-|17|17 A1|protein-coding	0.508	1.74475		0.36	0.286	0.964	0.422	0.835	1.168	3.379	1.597	1.77739	0.0228608	1
NM_016875	chr11	Ybx2|Msy2|-|11|11 B3|protein-coding	8.6865	29.9965		7.3	9.05	8.961	9.435	20.954	33.602	32.547	32.883	1.77727	1.98859e-15	1
NM_053088	chr7	Ifitm5|1110003J06Rik|AW213665|Bril|DSPA1|Hrmp1|Hrtm1|-|7|7 F5|protein-coding	1.8635	6.482		2.714	0.955	2.101	1.684	5.826	4.039	11.575	4.488	1.77628	0.0104698	1
NM_013524	chr2	Fut7|AI853193|FTVII|Fuc-TVII|FucT-VII|-|2|2 A3|protein-coding	7.5385	25.992		12.055	5.318	5.122	7.659	22.287	23.96	29.079	28.642	1.7661	6.3855e-06	1
NM_027711	chr13	Iqgap2|4933417J23Rik|A630053O10|AI788777|-|13 D1|13 50.26 cM|protein-coding	21.0905	71.9308		27.639	17.294	17.794	21.635	71.417	56.475	89.132	70.699	1.75798	2.99272e-10	1
NM_021273	chr12	Ckb|B-CK|Bck|Ck-3|Ck3|Ckbb|-|12 F1|12 61.09 cM|protein-coding	0.4815	1.63925		0.536	0.483	0.399	0.508	0.54	1.255	3.127	1.635	1.74976	0.0268002	1
NM_001012434	chr7	Kctd14|AI449310|D7Ertd760e|-|7 E1|7 53.51 cM|protein-coding	3.7275	12.4105		3.819	4.702	2.355	4.034	16.063	8.049	17.368	8.162	1.74686	0.000110742	1
NM_177861	chr4	Tmem67|5330408M12Rik|B230117O07|b2b1163.1Clo|b2b1291.1Clo|-|4|4 A1|protein-coding	0.7795	2.6005		0.773	0.724	0.847	0.774	2.926	2.671	2.646	2.159	1.73331	7.30549e-09	1
NM_153060	chr11	Spns2|-|-|11|11 B4|protein-coding	5.01675	16.9085		9.882	3.551	1.578	5.056	23.445	15.119	12.274	16.796	1.72815	0.0218738	1
NM_001081020	chr13	Adamts6|A930019D11Rik|ADAM-TS6|b2b1879.1Clo|b2b2029Clo|b2b2182Clo|b2b2187.1Clo|b2b2228Clo|-|13|13 D1|protein-coding	1.48875	4.9395		2.46	0.843	1.738	0.914	6.232	3.031	6.572	3.923	1.71015	0.00395057	1
NM_011226	chr6	Rab19|-|-|6|6 B1|protein-coding	8.552	28.0578		8.212	7.168	11.522	7.306	16.906	25.172	39.536	30.617	1.70363	1.69187e-06	1
NM_001198794	chr9	AB124611|Gm1706|-|9|9 A3|protein-coding	10.3577	34.0927		12.601	7.726	14.383	6.721	31.674	35.748	35.64	33.309	1.70169	5.01968e-07	1
NM_001198985	chr19	Tjp2|ZO-2|-|19|19 B|protein-coding	3.12875	10.3287		4.949	2.474	1.987	3.105	10.848	10.24	9.012	11.215	1.69805	7.79658e-06	1
NM_028829	chr1	Paqr8|1700019B16Rik|3110001D06Rik|-|1|1 A4|protein-coding	1.65425	5.26		1.627	1.774	1.09	2.126	5.207	4.234	6.557	5.042	1.67003	1.68808e-07	1
NM_001080820	chr2	Cass4|F730031O20Rik|-|2|2 H3|protein-coding	0.95075	2.992		0.71	0.725	1.407	0.961	3.375	2.268	3.747	2.578	1.66914	4.54637e-05	1
NM_054102	chr1	Ivns1abp|1190004M08Rik|1700126I16Rik|AA960440|HSPC068|ND1|NS-1|NS1-BP|Nd1-L|Nd1-S|mKIAA0850|-|1|1 G1|protein-coding	108.331	344.462		95.408	111.454	111.788	114.673	240.558	353.406	422.379	361.506	1.66394	2.25817e-15	1
NM_001161767	chr15	Galnt6|4632410F13|AW047994|GalNAc-T6|-|15|15 F1|protein-coding	7.66075	24.474		8.522	6.228	9.001	6.892	18.086	21.95	33.726	24.134	1.66344	1.17977e-09	1
NM_019395	chr13	Fbp1|Fbp-2|Fbp2|Fbp3|-|13|13 B3|protein-coding	11.2125	35.2805		4.636	8.847	22.86	8.507	14.045	43.439	42.592	41.046	1.65149	0.0229153	1
NM_018805	chr11	Hs3st3b1|3-OST-3B|3OST3B1|3Ost3b|AU041882|AW536289|Hs3st3b|m3-OST-3B|-|11 B3|11 39.47 cM|protein-coding	0.333	1.0455		0.266	0.36	0.37	0.336	0.643	0.726	1.69	1.123	1.65074	0.000728968	1
NM_025768	chr8	Grtp1|5430401C05Rik|C81211|Tbc1d6|-|8|8 A1.1|protein-coding	1.1585	3.6995		1.653	0.681	1.472	0.828	3.021	2.938	5.838	3.001	1.64986	0.00599304	1
NM_138310	chr7	Apobr|Apob-48r|Apob48r|-|7|7 F3|protein-coding	4.47525	14.0828		4.786	3.521	5.591	4.003	12.586	12.551	17.058	14.136	1.64495	1.26396e-10	1
NM_010053	chr2	Dlx1|Dlx|Dlx-1|-|2 C2|2 42.61 cM|protein-coding	0.777	2.415		0.661	0.868	0.912	0.667	1.727	2.62	2.649	2.664	1.63233	1.72206e-06	1
NM_027117	chr12	Klhdc2|2310022K15Rik|D12Ertd522e|HCLP-1|LCP|-|12 C2|12 28.77 cM|protein-coding	10.6625	33.3668		13.642	11.029	8.901	9.078	32.655	35.966	33.853	30.993	1.63111	7.38843e-12	1
NM_001174054	chr11	Camk2b|CaMKII|-|11 A1|11 3.89 cM|protein-coding	2.322	7.16575		1.596	2.014	2.842	2.836	5.96	6.621	8.539	7.543	1.63009	9.64974e-09	1
NM_001077410	chr6	Gimap8|Gm457|IAN9|IMAP8|-|6|6 B2.3|protein-coding	8.76875	27.1337		5.507	6.512	16.961	6.095	14.033	25.122	44.646	24.734	1.62807	0.00721043	0
NM_001127351	chr7	Sirt3|2310003L23Rik|AI848213|Sir2l3|-|7|7 F4-F5|protein-coding	22.494	69.8907		24.154	20.524	20.972	24.326	51.526	68.024	86.012	74.001	1.62463	4.25158e-14	1
NM_017467	chr5	Zfp316|Emzf1|Mzf3|Znf316|-|5|5 G2|protein-coding	0.845	2.60125		0.575	1.102	0.825	0.878	1.549	3.037	3.037	2.782	1.62335	2.64943e-06	1
NM_013692	chr15	Klf10|AI115143|EGR[a]|Egral|Gdnfif|TIEG-1|Tieg|Tieg1|mGIF|-|15|15 B3.1|protein-coding	3.47775	10.8007		4.34	3.59	3.248	2.733	8.66	10.479	13.475	10.589	1.61922	1.33151e-08	1
NM_001101516	chr1	Gpr25|Gm1300|-|1|1 E4|protein-coding	23.1242	70.8167		15.663	20.396	35.05	21.388	52.355	64.661	90.506	75.745	1.61657	2.96595e-07	1
NM_178110	chr4	Trim62|6330414G21Rik|AI450348|Dear1|-|4|4 D2.2|protein-coding	1.02175	3.09325		0.55	1.21	1.228	1.099	1.728	2.95	4.447	3.248	1.60519	0.000682642	1
NM_010188	chr1	Fcgr3|CD16|-|1 H3|1 78.8 cM|protein-coding	0.70725	2.1535		0.779	0.737	0.39	0.923	2.088	1.792	2.363	2.371	1.59584	0.000638816	1
NM_001007460	chr16	Zdhhc23|Gm1751|Gm779|nidd|-|16|16 B4|protein-coding	0.553	1.72075		1.03	0.334	0.436	0.412	1.642	1.447	2.38	1.414	1.59403	0.0233115	1
NM_015796	chr7	Fbxo17|Fbg4|Fbx17|Fbxo26|-|7|7 B1|protein-coding	1.76925	5.532		3.85	1.49	0.677	1.06	5.687	5.349	5.357	5.735	1.59156	0.036722	1
NM_011831	chr4	Insl5|RIF2|-|4 C6|4 47.27 cM|protein-coding	1.15775	3.5145		1.903	1.155	0.96	0.613	4.537	3.028	4.311	2.182	1.58602	0.0227752	1
NM_001001932	chr10	Eea1|A430109M19Rik|B230358H09Rik|ZFYVE2|-|10|10 C2|protein-coding	1.95475	5.9515		2.764	1.689	1.838	1.528	5.457	5.675	7.019	5.655	1.58571	1.80197e-07	1
NM_010146	chr10	Epm2a|TG-B|Tg(TcraK,TcrbK)TG-BFlv|-|10|10 A1|protein-coding	0.56525	1.694		0.391	0.429	0.978	0.463	1.41	1.749	1.761	1.856	1.57978	0.0034074	1
NM_001001985	chr5	Nat8l|1110038O08Rik|Shati|-|5|5 B2|protein-coding	0.476	1.40875		0.197	0.679	0.364	0.664	0.608	1.756	1.306	1.965	1.57076	0.0199264	0
NM_177788	chr8	Exoc3l|C730015A04Rik|Exoc3l1|-|8|8 D3|protein-coding	5.8245	17.3488		4.659	5.056	7.574	6.009	10.994	17.393	21.548	19.46	1.56958	1.57903e-07	1
NM_001101535	chr7	Ccdc8|ENSMUSG00000041117|-|7|7 A2|protein-coding	0.38875	1.15425		0.548	0.517	0.195	0.295	1.227	1.01	1.226	1.154	1.55313	0.00624427	1
NM_010593	chr11	Jup|Ctnng|D930025P04Rik|PG|-|11 D|11 63.47 cM|protein-coding	0.46625	1.3425		0.325	0.71	0.216	0.614	1.429	1.463	0.943	1.535	1.53588	0.00538722	1
NM_028576	chr17	Camkmt|1700106N22Rik|AI480743|AV099781|CLNMT|CaM KMT|-|17|17 E4|protein-coding	1.02275	2.97675		0.846	1.069	0.995	1.181	2.148	3.665	3.282	2.812	1.53557	4.77435e-05	1
NM_172277	chr5	Snx8|B130023O14Rik|-|5|5 G2|protein-coding	1.979	5.747		2.307	2.256	1.109	2.244	5.128	5.621	5.854	6.385	1.52755	1.19061e-05	1
NM_001042715	chr8	Drc7|Ccdc135|Gm770|SRG-L|SRG-S|-|8|8 C5|protein-coding	15.9432	45.75		13.125	15.008	18.754	16.886	36.878	42.117	59.286	44.719	1.52098	2.06412e-12	1
NM_010811	chr14	Ndst2|Mndns|NDST-2|-|14|14 A3|protein-coding	5.82475	16.7308		4.804	6.076	6.727	5.692	10.096	14.555	24.517	17.755	1.51951	1.63111e-06	1
NM_023065	chr8	Ifi30|GILT|IP30|-|8|8 B3.3|protein-coding	2.81875	8.162		4.076	2.883	1.843	2.473	9.426	6.383	8.187	8.652	1.51761	0.000569274	1
NM_145148	chr6	Frmd4b|6030440G05Rik|C87375|GOBLIN|GRSP1|R74720|-|6|6 D3|protein-coding	1.958	5.6415		1.594	1.549	2.876	1.813	2.638	7.01	5.831	7.087	1.50974	0.000647251	1
NM_178726	chr3	Ppm1l|3222401G13|5930404J21Rik|AI481720|AW045850|PP2C|PP2Cepsilon|Pp2ce|Ppp2ce|mKIAA4175|-|3|3 E1|protein-coding	3.0415	8.67625		2.111	3.105	3.048	3.902	3.395	8.045	12.424	10.841	1.50947	0.00211115	1
NM_011066	chr1	Per2|mKIAA0347|mPer2|-|1|1 D|protein-coding	0.92025	2.62625		0.753	0.866	1.041	1.021	1.686	2.703	3.164	2.952	1.5083	1.19198e-06	1
NM_031184	chr16	Glis2|Gli5|Klf16|Nkl|-|16 A1|16 2.45 cM|protein-coding	2.62375	7.3905		1.982	3.504	1.453	3.556	5.43	7.564	8.211	8.357	1.49738	0.000129247	1
NM_009980	chr7	Ctbp2|AA407280|D7Ertd45e|Gtrgeo6|Ribeye|-|7 F3|7 76.32 cM|protein-coding	0.65025	1.79875		0.766	0.951	0.219	0.665	1.807	1.905	1.469	2.014	1.49476	0.0206731	0
NM_024475	chr11	Ublcp1|4930527B16Rik|8430435I17Rik|BC002236|-|11|11 B1.1|protein-coding	2.1385	6.001		1.468	2.668	2.352	2.066	3.527	6.48	8.118	5.879	1.49044	0.000124526	1
NM_001033355	chr7	Zfp568|C80731|Gm1691|Znf568|chato|-|7|7 B1|protein-coding	2.1085	5.9265		2.053	2.166	2.304	1.911	5.819	5.635	6.575	5.677	1.48827	3.94613e-14	1
NM_023732	chr1	Abcb6|1200005B17Rik|-|1|1 C4|protein-coding	1.705	4.7955		1.944	1.982	1.267	1.627	4.604	4.824	5.104	4.65	1.48381	2.14493e-07	1
NM_001162999	chr3	Fnip2|D630023B12Rik|mKIAA1450|-|3|3 E3|protein-coding	0.35825	1.01575		0.604	0.295	0.148	0.386	1.304	0.838	0.95	0.971	1.47952	0.0222417	1
NM_009525	chr6	Wnt5b|AW545702|Wnt-5b|-|6 F1|6 56.86 cM|protein-coding	0.3955	1.11675		0.643	0.375	0.365	0.199	1.616	1.063	0.761	1.027	1.47223	0.0366488	1
NM_001177602	chr4	Ak4|AK 4|Ak-3|Ak-4|Ak3|Ak3l1|D4Ertd274e|-|4 C6|4 46.84 cM|protein-coding	2.8865	8.1465		3.513	2.001	3.908	2.124	6.68	7.39	10.356	8.16	1.47	5.43597e-05	1
NM_016762	chr15	Matn2|Crtm2|matrilin-2|-|15|15 B3.1|protein-coding	2.21375	6.05775		1.559	3.83	1.35	2.116	4.668	4.646	10.011	4.906	1.46548	0.00805164	1
NM_028064	chr15	Slc39a4|1600025H15Rik|AU041686|AWMS2|ZIP4|-|15|15 D3|protein-coding	1.0145	2.84475		1.837	0.625	0.935	0.661	4.447	1.939	2.428	2.565	1.4629	0.0472104	1
NM_145940	chr11	Wipi1|4930533H01Rik|AW411817|D11Ertd498e|-|11 E1|11 72.18 cM|protein-coding	1.99375	5.5025		2.676	2.851	0.839	1.609	6.579	5.485	5.344	4.602	1.45541	0.00939172	1
NM_008091	chr2	Gata3|Gata-3|jal|-|2 A1|2 6.69 cM|protein-coding	38.5622	105.659		28.999	36.617	47.831	40.802	59.919	92.015	153.06	117.641	1.45235	2.2694e-05	1
NM_011734	chr9	Siae|LSE|Ysg2|-|9 A4|9 20.79 cM|protein-coding	6.495	17.7688		5.923	6.153	7.126	6.778	12.892	16.041	24.528	17.614	1.44796	1.11916e-08	0
NM_146064	chr15	Soat2|ACAT2|D15Wsu97e|-|15 F2|15 57.33 cM|protein-coding	2.365	6.46925		2.386	2.117	2.195	2.762	5.091	5.909	8.307	6.57	1.4444	1.35448e-06	1
NM_009937	chr14	Colq|A130034K24Rik|-|14|14 B|protein-coding	24.6778	66.7082		8.992	26.639	34.846	28.234	35.584	72.395	80.625	78.229	1.4431	0.00594417	1
NM_198111	chr12	Akap6|AI482140|Akapalpha|Akapbeta|PRKA|-|12|12 C1|protein-coding	1.77775	4.86075		1.849	1.307	2.511	1.444	3.685	4.473	6.318	4.967	1.43946	1.39767e-05	1
NM_001166065	chr13	Gcnt4|C2gnt3|Gm279|Gm73|-|13|13 D1|protein-coding	0.3745	1.01575		0.227	0.348	0.424	0.499	0.34	1.119	1.42	1.184	1.43616	0.0369927	1
NM_146167	chr6	Gimap7|IAN7|Ian3|-|6|6 B2.3|protein-coding	9.69425	26.4275		9.387	5.966	17.685	5.739	17.033	26.458	37.162	25.057	1.43298	0.011934	1
NM_134257	chr4	Rgs3|4930506N09Rik|C2PA-RGS3|C2pa|PDZ-RGS3|RGS3S|-|4 B3|4 33.19 cM|protein-coding	4.94425	12.2553		3.247	5.311	5.372	5.847	8.44	11.76	16.479	12.342	1.42515	6.74577e-06	1
NM_001114597	chr19	Ehbp1l1|G430002G23Rik|-|19|19 A|protein-coding	6.549	17.7715		5.536	7.504	6.666	6.49	10.826	15.599	27.851	16.81	1.41971	3.11399e-05	1
NM_177564	chr11	Dhrs11|-|-|11|11 C|protein-coding	3.1385	8.4965		3.88	2.986	2.579	3.109	6.227	8.589	10.071	9.099	1.41894	1.54174e-05	0
NM_011122	chr4	Plod1|2410042F05Rik|AI854890|AV007929|Lh1|Plod|-|4 E2|4 78.57 cM|protein-coding	2.67325	7.042		1.444	4.014	2.168	3.067	7.16	7.041	7.196	6.771	1.41468	0.000120232	1
NM_172523	chr19	Slc18a2|1110037L13Rik|9330105E13|Vmat2|-|19 D3|19 54.64 cM|protein-coding	2.003	5.328		1.447	1.947	2.087	2.531	2.247	4.647	9.107	5.311	1.41053	0.00910222	1
NM_172685	chr3	Slc25a24|2610016M12Rik|-|3|3 F3|protein-coding	3.1525	8.544		6.314	2.313	1.895	2.088	12.453	6.808	7.956	6.959	1.40916	0.0455875	1
NM_001270495	chr14	Tmem254b|ENSMUSG00000021867|Gm9746|-|14 A3|14|protein-coding	44.6817	126.413		63.74	38.662	39.548	36.777	135.227	122.287	116.51	131.627	1.39925	8.74682e-07	0
NM_001270498	chr14	Tmem254c|ENSMUSG00000072676|Gm10395|-|14 A3|14|protein-coding	44.3372	118.38		63.377	39.29	37.166	37.516	126.575	114.786	107.132	125.027	1.39816	8.0405e-07	0
NM_026679	chr14	Tmem254a|0610008K04Rik|0610010A22Rik|AA960404|D14Ertd449e|Tmem254|-|14 A3|14 15.19 cM|protein-coding	29.8835	79.7715		42.7	26.489	25.083	25.262	85.23	77.323	72.18	84.353	1.39785	7.95015e-07	1
NR_003368	chr15	Pvt1|Ayu21-84Imeg|Gt(pU21)84Imeg|Mis-1|Mlvi-1|Pvt-1|-|15 D1|15 26.24 cM|ncRNA	0.57025	1.5015		0.581	0.531	0.755	0.414	1.022	1.038	2.621	1.325	1.39006	0.0227208	0
NM_011449	chr9	Spa17|Sp17|-|9|9 A4|protein-coding	0.63725	1.68225		0.691	0.674	0.497	0.687	1.846	1.373	1.713	1.797	1.38693	0.00395057	1
NM_001347244	chr16	Arl6|1110018H24Rik|2210411E14Rik|BBS3|-|16|16 C1.3|protein-coding	0.52125	1.3795		0.547	0.644	0.374	0.52	1.018	1.42	1.777	1.303	1.38398	0.0034278	1
NM_010194	chr7	Fes|AI586313|BB137047|FPS|c-fes|-|7 D2|7 45.65 cM|protein-coding	5.734	14.952		6.302	5.701	4.447	6.486	16.577	13.897	14.655	14.679	1.37856	5.88867e-09	1
NM_173442	chr19	Gcnt1|5630400D21Rik|B130048E03|C2 GlcNAcT|C2GNT|IGnT|-|19 B|19 12.75 cM|protein-coding	1.2245	3.2555		2.258	0.947	0.791	0.902	4.289	2.819	3.233	2.681	1.37705	0.0222417	1
NM_172701	chr4	Oscp1|1810007P19Rik|5730415O04|6030436A01Rik|-|4|4 D2.2|protein-coding	0.67875	1.77675		0.661	0.695	0.649	0.71	1.145	2.082	2.159	1.721	1.37686	0.000965797	1
NM_008841	chr8	Pik3r2|p85beta|-|8 B3.3|8 34.15 cM|protein-coding	19.4318	50.3928		18.797	19.824	18.116	20.99	42.606	46.271	56.682	56.012	1.37052	2.36851e-15	0
NM_145456	chr13	Zswim6|2900036G02Rik|mKIAA1577|-|13|13 D2.1|protein-coding	3.02475	7.78125		2.713	2.729	3.409	3.248	6.802	6.639	10.423	7.261	1.36288	6.7463e-08	1
NM_019968	chr13	Arl10|Arl10a|Arm1|-|13|13 B1|protein-coding	3.5065	8.996		3.094	3.401	3.583	3.948	8.68	8.52	9.098	9.686	1.35797	6.16469e-07	0
NM_001039185	chr7	Ceacam1|Bgp|Bgp1|C-CAM|CD66a|Cc1|Cea-1|Cea-7|Cea1|Cea7|Hv-2|Hv2|MHVR|MHVR1|Mhv-1|bb-1|mCEA1|mmCGM1|mmCGM1a|mmCGM2|-|7 A3|7 13.84 cM|protein-coding	1.2505	3.22775		0.778	1.368	1.28	1.576	1.632	3.975	3.589	3.715	1.35709	0.00207204	0
NM_016675	chrX	Cldn2|AL022813|-|X|X F1|protein-coding	1.05575	2.7005		0.702	1.204	1.109	1.208	1.224	3.042	3.302	3.234	1.35295	0.00592905	1
NM_175035	chr6	Gimap5|D630024P16|E230026N22Rik|-|6|6 B2.3|protein-coding	14.5303	37.0595		11.821	12.525	20.428	13.347	27.61	35.612	48.561	36.455	1.34811	2.91002e-06	1
NM_013520	chr7	Flt3l|Flt3lg|Ly72L|-|7 B3|7 29.14 cM|protein-coding	4.4965	11.678		7.243	3.264	4.495	2.984	10.566	10.737	14.718	10.691	1.34805	0.00584018	1
NM_025907	chr14	Mettl6|1600013P15Rik|AI467521|AU020711|-|14|14 B|protein-coding	33.3597	85.157		19.787	40.254	34.761	38.637	29.593	115.184	90.997	104.854	1.34649	0.0101767	0
NM_153408	chr1	Neurl3|2010300P06Rik|Lincr|-|1|1 B|protein-coding	2.11025	5.383		2.502	1.733	1.581	2.625	6.781	5.226	5.227	4.298	1.34481	0.000270749	1
NM_008353	chr8	Il12rb1|CD212|IL-12R[b]|-|8 B3.3|8 34.21 cM|protein-coding	11.818	30.118		11.618	11.658	10.899	13.097	24.266	28.619	34.384	33.203	1.34365	5.01491e-13	1
NM_001035510	chrX	Zcchc18|1500031H04Rik|Sizn2|-|X|X F1|protein-coding	0.6465	1.65075		0.646	0.633	0.518	0.789	0.837	1.844	1.962	1.96	1.3424	0.00543247	0
NM_008626	chr11	Mrc2|Endo180|mKIAA0709|uPARAP|-|11|11 E1|protein-coding	5.096	12.7695		3.076	8.863	3.081	5.364	10.799	13.537	12.803	13.939	1.33666	0.00146887	1
NM_009601	chr11	Chrnb1|Achr-2|Acrb|-|11 B3|11 42.87 cM|protein-coding	2.40325	6.03825		1.546	2.14	3.51	2.417	3.728	5.992	9.031	5.402	1.33101	0.00467919	1
NM_010631	chr8	Kifc3|AI325457|BB123200|-|8 C5|8 47.12 cM|protein-coding	7.657	19.123		3.373	8.302	10.394	8.559	6.357	23.879	22.648	23.608	1.32005	0.0441956	1
NM_001110320	chr4	Cd72|CD72c|Ly-19|Ly-32|Ly-m19|Lyb-2|-|4 A5|4 23.04 cM|protein-coding	24.8625	61.7942		17.215	22.029	34.2	26.006	47.933	72.755	65.858	60.631	1.31918	3.82566e-07	1
NM_207206	chr2	Lpcat4|AI505034|Agpat7|Aytl3|LPEAT2|-|2|2 E3|protein-coding	11.715	28.983		13.87	10.071	10.389	12.53	27.378	27.516	31.114	29.924	1.29535	4.95213e-09	1
NM_007657	chr6	Cd9|Tspan29|-|6 F3|6 59.32 cM|protein-coding	14.09	34.4873		11.332	18.107	13.445	13.476	30.515	37.301	34.594	35.539	1.29348	1.77002e-09	1
NM_029548	chr11	Rph3al|Gm1753|Noc2|-|11|11 B5|protein-coding	0.556	1.3565		0.42	0.552	0.64	0.612	0.918	1.375	1.769	1.364	1.28551	0.00467998	1
NM_031247	chr6	Gimap3|2010110D23Rik|Gimap5|Ian4|-|6|6 B2.3|protein-coding	2.52125	6.108		2.378	2.005	3.262	2.44	5.595	5.39	7.591	5.856	1.27242	6.92803e-05	1
NM_007544	chr6	Bid|2700049M22Rik|AI875481|AU022477|-|6 F1|6 57.02 cM|protein-coding	11.6128	28.0343		10.816	12.571	11.57	11.494	27.938	27.916	27.977	28.306	1.27048	4.52259e-14	1
NM_001164791	chr2	Map3k20|AV006891|B230120H23Rik|MLTK|MLTKalpha|MLTKbeta|Zak|-|2|2 C3|protein-coding	2.00625	4.864		2.132	2.192	1.724	1.977	4.448	5.616	4.431	4.961	1.26837	7.13085e-09	1
NM_029352	chrX	Dusp9|Dusp4|Mpk4|Pyst3|-|X|X A7.3|protein-coding	1.09175	2.65075		1.158	1.25	0.893	1.066	1.632	2.549	2.929	3.493	1.26804	0.00193766	1
NM_027919	chr11	Tha1|1300017K07Rik|GLY1|-|11|11 E2|protein-coding	4.81975	11.6073		4.638	4.335	5.949	4.357	9.938	10.594	14.992	10.905	1.26327	8.93775e-06	1
NM_008750	chr11	Nxn|l11Jus13|-|11 B5|11 45.92 cM|protein-coding	9.198	22.1273		10.965	9.934	6.721	9.172	20.429	22.582	20.96	24.538	1.25436	1.5139e-07	1
NM_001033306	chr4	Shb|BC028832|-|4|4 B1|protein-coding	2.9255	6.87425		1.696	3.872	2.199	3.935	5.215	7.016	6.722	8.544	1.24146	0.00199224	1
NM_011101	chr11	Prkca|AI875142|Pkca|-|11 E1|11 70.8 cM|protein-coding	17.8255	42.439		21.839	13.503	19.945	16.015	36.071	36.66	54.475	42.55	1.2373	1.27278e-05	1
NM_010576	chr2	Itga4|CD49D|Itga4B|-|2 C3|2 47.38 cM|protein-coding	94.2553	221.56		54.94	90.987	120.298	110.796	120.43	204.779	317.037	243.993	1.23666	0.00333644	1
NM_013495	chr19	Cpt1a|C730027G07|CPTI|Cpt1|-|19 A|19 3.08 cM|protein-coding	36.74	86.7995		43.005	31.014	41.059	31.882	78.968	79.702	103.732	84.796	1.22883	1.62922e-07	1
NM_010150	chr8	Nr2f6|AV090102|COUP-TF3|EAR2|Erbal2|-|8 B3.3|8 34.43 cM|protein-coding	10.2922	23.982		8.022	13.008	7.659	12.48	18.831	27.793	20.954	28.35	1.22016	1.42028e-05	1
NM_016923	chr1	Ly96|ESOP-1|MD-2|MD2|-|1|1 A3|protein-coding	1.237	3.05675		1.451	0.719	1.708	1.07	2.194	3.214	3.598	3.221	1.21829	0.0154516	1
NM_145508	chr1	Dyrk3|BC006704|-|1|1 E4|protein-coding	1.8985	4.462		2.752	1.731	1.762	1.349	4.689	4.376	4.296	4.487	1.21149	0.00311873	1
NM_001195537	chr15	Smpd5|ENSMUSG00000071724|Gm10345|MA-nSMase|-|15|15 D3|protein-coding	0.88175	2.0465		0.867	0.801	0.885	0.974	2.006	1.921	2.53	1.729	1.20909	0.00241411	1
NM_026172	chr4	Decr1|1200012F07Rik|Decr|Nadph|-|4|4 A2|protein-coding	3.80975	8.8485		4.518	4.016	3.445	3.26	8.449	8.708	9.101	9.136	1.20439	1.16682e-06	1
NM_177461	chr15	Micall1|AI448246|D15Mit260|D15N2e|EST573322|EST820961|MIRab13|mKIAA1668|-|15 E1|15 37.7 cM|protein-coding	3.858	8.914		3.785	3.402	4.155	4.09	7.486	8.31	10.565	9.295	1.20237	3.98171e-09	1
NM_013566	chr15	Itgb7|Ly69|-|15 F3|15 57.39 cM|protein-coding	23.6475	55.0218		36.294	18.818	16.236	23.242	62.599	49.668	54.682	53.138	1.19926	0.00118125	1
NM_172721	chr5	Fbxw8|4930438M06Rik|FBW6|FBW8|FBXO29|Fbx29|-|5|5 F|protein-coding	7.663	17.758		10.321	7.087	6.538	6.706	18.716	16.849	16.683	18.784	1.19691	3.26083e-06	1
NM_001310536	chr3	Rapgef2|5830453M24Rik|CNRasGEF|Pdzgef1|RA-GEF-1|mKIAA0313|nRapGEP|-|3|3 E3|protein-coding	17.786	40.723		14.315	18.65	14.755	23.424	32.887	40.683	42.846	46.476	1.19588	1.06847e-07	1
NM_001316755	chr2	Cnbd2|4921517L17Rik|5430421B09Rik|Cris|-|2 H1|2|protein-coding	11.0875	25.4937		12.846	13.015	7.313	11.176	28.227	28.383	20.413	24.952	1.19363	6.55244e-05	1
NM_001110271	chr9	Abhd14a|1110013B16Rik|AW558221|Dorz1|-|9|9 F1|protein-coding	8.0785	18.0145		9.308	6.783	7.507	8.716	14.632	17.291	22.031	18.104	1.18921	4.21986e-06	1
NM_001290421	chrX	Flna|ABP-280|Dilp2|F730004A14Rik|Fln1|GENA 379|filamin-1|-|X A7.3|X 37.89 cM|protein-coding	37.2253	85.7075		50.238	38.31	18.722	41.631	83.952	79.395	86.539	92.944	1.18899	0.00191852	1
NM_009256	chr13	Serpinb9|BB283241|CAP-3|CAP3|PI-9|PI9|Spi6|ovalbumin|-|13 A3.2|13 13.79 cM|protein-coding	2.70175	6.157		2.507	2.782	2.65	2.868	5.498	6.645	6.012	6.473	1.18406	3.45807e-08	1
NM_024413	chr7	Plekhf1|1810013P09Rik|APPD|LAPF|PHAFIN1|ZFYVE15|-|7|7 B3|protein-coding	2.02325	4.5665		1.517	3.327	1.012	2.237	3.36	4.611	5.19	5.105	1.18061	0.0391792	1
NM_008976	chr1	Ptpn14|C130080N23Rik|OTTMUSG00000022087|PTP36|-|1 H6|1 95.03 cM|protein-coding	0.6585	1.4915		0.662	0.757	0.512	0.703	0.847	1.559	1.667	1.893	1.16768	0.00179047	1
NM_053214	chr17	Myo1f|C330006B10Rik|-|17 B1|17 17.98 cM|protein-coding	7.47075	16.921		10.594	6.215	5.031	8.043	18.608	14.333	17.765	16.978	1.16471	0.000851141	1
NM_001004164	chr10	Gnptab|EG432486|mKIAA1208|-|10|10 C1|protein-coding	13.365	30.039		13.969	13.022	13.633	12.836	30.83	28.058	32.716	28.552	1.16435	1.02752e-11	1
NM_001102611	chr11	Smyd4|G430029E23Rik|-|11|11 B5|protein-coding	2.48425	5.59625		3.075	2.447	1.973	2.442	6.19	5.058	5.719	5.418	1.16217	7.97145e-05	1
NM_001242934	chr11	Bcl11a|2810047E18Rik|BCL-11A|Ctip1|D930021L15Rik|Evi9|Evi9a|Evi9b|Evi9c|mKIAA1809|-|11|11 A3.2|protein-coding	2.044	4.7635		1.411	2.519	1.128	3.118	3.236	6.067	4.029	5.722	1.16159	0.0123137	1
NM_025460	chr7	Tmem126a|1810020E01Rik|-|7|7 E1|protein-coding	7.4965	16.8725		9.117	6.116	8.497	6.256	17.138	15.361	18.459	16.532	1.15743	0.000426289	1
NM_010617	chr13	Kif13a|4930505I07Rik|mKIAA4109|-|13|13 A5|protein-coding	3.1515	7.01625		2.961	2.887	3.368	3.39	5.374	6.19	8.967	7.534	1.15003	2.35577e-06	1
NM_001048176	chr2	Cerkl|Gm1958|Rp26|-|2|2 C3|protein-coding	9.05975	20.0407		5.23	8.94	11.748	10.321	10.806	18.768	29.536	21.053	1.14947	0.014805	0
NM_028133	chr12	Egln3|2610021G09Rik|AI505553|AI648162|Hif-p4h-3|Phd3|SM-20|-|12|12 C1|protein-coding	21.8807	48.8648		27.803	18.056	22.984	18.68	55.351	42.691	49.76	47.657	1.14825	9.86224e-06	1
NM_026058	chr8	Cers4|2900019C14Rik|Lass4|Trh1|-|8|8 A1.1|protein-coding	0.73825	1.6625		1.083	0.892	0.54	0.438	1.617	1.87	1.223	1.94	1.14717	0.0493097	1
NM_023794	chr16	Etv5|1110005E01Rik|8430401F14Rik|ERM|-|16|16 B1|protein-coding	13.35	29.298		7.188	13.589	17.402	15.221	21.864	27.606	35.816	31.906	1.14246	0.000639499	1
NM_001122733	chr5	Kit|Bs|CD117|Fdc|Gsfsco1|Gsfsco5|Gsfsow3|SCO1|SCO5|SOW3|Ssm|Tr-kit|W|c-KIT|-|5 C3.3|5 39.55 cM|protein-coding	52.497	115.597		34.871	57.109	44.486	73.522	73.469	115.245	142.457	131.216	1.14234	0.000742004	1
NM_009790	chr12	Calm1|AI256814|AI327027|AI461935|AL024000|CaM|Calm|-|12|12 E|protein-coding	43.7152	97.6268		64.374	37.845	38.518	34.124	101.97	89.083	107.438	92.016	1.14001	0.000484879	1
NM_021439	chr10	Chst11|1110020P09Rik|C4ST|C4ST-1|C4ST1|C4s|-|10|10 C1|protein-coding	7.86125	17.345		6.945	7.538	8.176	8.786	14.102	16.399	19.897	18.982	1.1391	4.4289e-10	1
NM_207203	chr8	Prr36|-|-|8|8 A1.1|protein-coding	1.2235	2.69875		1.218	0.923	1.567	1.186	2.127	2.313	3.809	2.546	1.13394	0.00378558	1
NM_153572	chr5	Katnal1|-|-|5|5 G3|protein-coding	3.43025	7.48825		2.415	3.247	4.882	3.177	4.651	7.285	9.883	8.134	1.12517	0.00235996	1
NM_019832	chr13	Gkap1|42kDa|4933400B15Rik|D13Ertd340e|Gkap42|-|13 B1|13 30.97 cM|protein-coding	1.22125	2.6495		0.959	1.72	0.903	1.303	1.461	3.119	3.152	2.866	1.11649	0.0464692	0
NM_013820	chr6	Hk2|AI642394|HKII|-|6 C3|6 35.94 cM|protein-coding	4.42225	9.652		5.399	4.582	3.113	4.595	9.876	9.042	9.501	10.189	1.11604	2.18476e-05	1
NM_001081066	chr15	Dennd3|AI447457|E030003N15Rik|-|15|15 D3|protein-coding	11.7515	25.5263		10.268	10.199	13.867	12.672	16.916	22.811	36.104	26.274	1.11482	0.000165636	1
NM_144915	chr5	Daglb|E330036I19Rik|-|5|5 G2|protein-coding	1.03925	2.254		0.959	1.264	0.804	1.13	1.933	2.452	2.288	2.343	1.11462	0.000784651	1
NR_033520	chr17	Tmem181b-ps|Tmem181b|-|17 A1|17|pseudo	9.862	21.1515		6.765	10.834	10.636	11.213	13.378	21.349	27.39	22.489	1.10253	0.000165474	1
NM_001009818	chr5	Sept11|6230410I01Rik|AW548875|D5Ertd606e|-|5 E2|5 47.29 cM|protein-coding	14.1932	30.8023		22.789	15.132	6.388	12.464	37.395	28.088	27.352	30.374	1.09887	0.0457623	1
NM_023680	chr7	Tnfrsf22|2810028K06Rik|C130035G06Rik|SOBa|Tnfrh2|Tnfrsf1al2|mDcTrailr2|-|7 F5|7 88.27 cM|protein-coding	1.461	3.141		1.24	1.268	1.593	1.743	2.206	3.033	3.926	3.399	1.09653	0.000915166	1
NM_001310576	chr15	1700088E04Rik|ESTJ0827E04|-|15 E1|15 37.7 cM|protein-coding	3.7295	7.93075		3.238	3.627	3.942	4.111	6.737	7.823	9.594	7.569	1.0851	0.000342876	0
NM_145448	chr12	9030617O03Rik|-|-|12|12 E|protein-coding	2.28125	4.89625		3.148	2.304	1.594	2.079	5.258	5.243	4.518	4.566	1.0848	0.00325932	1
NM_009112	chr3	S100a10|42C|AA409961|AL024248|CAL12|CLP11|Cal1l|p10|p11|-|3 F2.1|3 40.51 cM|protein-coding	113.399	242.961		125.574	140.146	70.948	116.93	156.028	287.499	256.048	272.268	1.08455	0.00128858	1
NM_010301	chr10	Gna11|Dsk7|E430025L19|-|10 C1|10 39.72 cM|protein-coding	9.179	19.3897		6.301	10.664	10.425	9.326	15.308	20.052	22.493	19.706	1.0831	5.31223e-06	1
NM_001039386	chr2	Nsmf|Jacob|Nelf|-|2|2 A3|protein-coding	3.2725	6.95575		3.147	4.024	2.699	3.22	4.759	7.229	8.274	7.561	1.08144	0.000415733	1
NM_001164620	chr11	Ccdc157|4930562D19Rik|mKIAA1656|-|11|11 A1|protein-coding	2.0245	4.29025		1.488	2.125	2.548	1.937	2.298	4.541	5.938	4.384	1.08046	0.0100468	0
NM_011877	chr12	Ptpn21|PTPD1|PTPRL10|-|12|12 E|protein-coding	0.57775	1.23425		0.539	0.71	0.574	0.488	0.943	1.221	1.646	1.127	1.07978	0.00624427	1
NM_001159910	chr12	Ccdc85c|EG668158|Gm265|Gm9010|-|12|12 F1|protein-coding	14.6465	30.954		12.314	14.851	12.371	19.05	22.219	30.411	31.501	39.685	1.07641	0.000100173	1
NM_001289549	chr2	St6galnac6|ST6GalNAcVI|Siat7f|-|2|2 B|protein-coding	5.38925	11.411		5.085	5.844	5.063	5.565	10.182	10.725	13.071	11.666	1.07516	6.95089e-07	1
NM_007753	chr3	Cpa3|MC-CPA|-|3 A2|3 6.25 cM|protein-coding	149.883	314.575		138.742	146.07	151.845	162.876	340.004	297.777	341.585	278.932	1.07163	2.2293e-09	1
NM_020028	chr8	Lpar2|Edg4|IPA2|LPA2|-|8 B3.3|8 33.91 cM|protein-coding	3.569	7.5195		3.714	3.297	3.586	3.679	7.041	7.035	8.364	7.638	1.06899	9.86933e-08	1
NM_001163743	chr9	Nlrx1|BC034204|NOD9|-|9|9 A5.2|protein-coding	1.1675	2.457		1.482	0.903	1.52	0.765	2.623	2.073	3.024	2.108	1.06784	0.0320029	0
NM_001111096	chr4	Lyn|AA407514|Hck-2|p53Lyn|p56Lyn|-|4 A1|4 2.05 cM|protein-coding	6.005	12.59		5.789	6.22	4.726	7.285	12.482	12.17	12.755	12.953	1.06674	1.28041e-06	0
NM_001252450	chr16	Cldnd1|1110019C08Rik|AA407103|AI849195|AW489850|Cldn25|-|16|16 C1.2|protein-coding	11.0437	23.21		11.843	12.546	9.237	10.549	14.359	20.575	33.831	24.075	1.06423	0.00259125	1
NM_001114665	chr3	Fnbp1l|2610318I01Rik|AW548221|TOCA1|toca-1|-|3|3 G1|protein-coding	0.60425	1.25525		0.748	0.772	0.434	0.463	1.466	1.363	0.804	1.388	1.04316	0.0494095	0
NM_010700	chr9	Ldlr|Hlb301|-|9 A3|9 7.87 cM|protein-coding	21.5048	44.3793		20.851	20.085	21.135	23.948	37.565	36.865	58.432	44.655	1.04257	5.34302e-06	1
NM_145135	chr7	Rnh1|AW546468|C80305|RNH|-|7|7 F5|protein-coding	11.9292	24.4515		13.633	12.748	9.031	12.305	24.695	24.187	25.189	23.735	1.04035	1.12355e-05	1
NM_145070	chr5	Hip1r|AA410023|mKIAA0655|-|5|5 F|protein-coding	9.75975	20.2447		10.893	8.993	9.531	9.622	15.709	21.333	21.485	22.452	1.03903	2.24832e-07	1
NM_019552	chr8	Abcb10|Abc-me|Abcb12|-|8|8 E2|protein-coding	4.06425	8.337		3.317	4.038	4.495	4.407	7.927	8.448	8.69	8.283	1.03822	2.0223e-07	1
NR_015577	chr11	Ube2d-ps|1600028I17Rik|2210015D19Rik|AI596465|-|11|11 A1|ncRNA	1.3145	2.71525		1.516	1.315	1.162	1.265	3.067	2.595	2.684	2.515	1.03781	0.00611084	0
NM_010173	chr4	Faah|AW412498|-|4 D1|4 53.08 cM|protein-coding	9.15675	18.815		6.762	7.369	14.612	7.884	12.539	18.079	24.559	20.083	1.03601	0.0110311	1
NM_026988	chr6	Ptms|2610009E16Rik|-|6|6 F2|protein-coding	24.57	49.8588		28.244	32.904	14.407	22.725	75.015	43.104	35.41	45.906	1.025	0.0385942	1
NM_018811	chr7	Abhd2|2210009N18Rik|LABH2|Labh-2|-|7|7 D2|protein-coding	27.135	55.6575		33.559	19.311	30.452	25.218	53.637	48.04	63.727	57.226	1.02331	0.000299052	1
NM_015733	chr4	Casp9|AI115399|APAF-3|AW493809|CASP-9|Caspase-9|ICE-LAP6|Mch6|-|4|4 E1|protein-coding	3.56425	7.27425		3.496	3.516	3.519	3.726	5.835	6.614	9.336	7.312	1.0226	5.65778e-05	1
NM_001039390	chr2	Pkig|PKIgamma|-|2 H3|2 84.4 cM|protein-coding	28.2657	57.0435		33.931	29.674	21.739	27.719	62.78	58.099	48.528	58.767	1.02066	7.4658e-05	1
NM_172546	chr10	Cnksr3|6820402C05|BC024086|Magi1|-|10|10 A1|protein-coding	3.91425	8.00725		5.116	3.602	3.811	3.128	8.061	6.665	9.77	7.533	1.01945	0.00239619	1
NM_001033178	chr17	Tmem181a|5930418K15Rik|C76977|Gpr178|Tmem181|mKIAA1423|-|17|17 A1|protein-coding	9.99325	20.2385		7.482	10.915	10.574	11.002	13.736	20.418	25.369	21.431	1.01829	5.31797e-05	1
NM_153175	chr6	Gimap6|4833419H03Rik|Ian6|mFLJ00102|-|6|6 B2.3|protein-coding	37.1038	74.858		21.025	35.633	57.932	33.825	46.1	75.032	99.54	78.76	1.01552	0.0255578	1
NM_145491	chr17	Rhoq|Arhq|TC10A|Tc10|-|17 E4|17 56.9 cM|protein-coding	4.1195	8.3155		4.937	4.409	3.389	3.743	9.991	7.572	8.063	7.636	1.00768	0.000455471	1
NM_027906	chr14	Vwa8|1300010F03Rik|4932416F07Rik|AI957255|Kiaa0564|mKIAA0564|-|14|14 D3|protein-coding	3.207	6.51125		4.004	2.59	3.39	2.844	6.158	5.886	7.329	6.672	1.00749	0.0002304	1
NM_001110192	chr1	Inpp5d|SHIP|SHIP-1|SHIP1|SIP-145|p150Ship|s-SHIP|-|1 D|1 44.44 cM|protein-coding	18.3595	36.9117		19.674	17.324	15.935	20.505	40.339	33.382	36.683	37.243	1.00449	3.52451e-07	1
NM_011792	chr9	Bace1|ASP2|Bace|C76936|-|9|9 A5.2|protein-coding	16.6202	33.48		17.424	13.444	19.72	15.893	32.383	30.882	38.121	32.534	1.00394	3.56391e-06	1
NM_178598	chr1	Tagln2|2700094C18Rik|SM22beta|Sm22B|Sm22a|-|1 H3|1 79.89 cM|protein-coding	116.85	237.573		190.156	96.95	80.431	99.864	271.46	224.626	216.285	237.92	1.00041	0.0220783	1
